# Supplementary material for: Extensive Pyrosequencing Reveals Frequent Intra-Genomic Variations of Internal Transcribed Spacer Regions of Nuclear Ribosomal DNA
Source: PubMed Central journal article supplement (PMC3431384; doi:10.1371/journal.pone.0043971), 2012-08-30

**Figure S5.** ITS2 variants representing molecular fossils in the genus *Armeniaca* (Rosaceae) **(A)** The variants are linked using red and blue lines at 100% and 95% identities, respectively. Each open box represents a single variant with RVA over 1%, and each solid box represents the variants with RVA less than 1%. The ruler shows the RVA in percentage. **(B,C)** The Neighbor-Joining (NJ) and Maximum Parsimony (MP) trees of ITS2 variants indicated that genetic information from the common ancestor was maintained in the genomes of two species derived from *Armeniaca* (Rosaceae). The same colors represent the same species. The same shade and color of symbols show the variants with 100% identity. The Latin names of species are followed by the rank and RVA of the variants. **(D)** The ITS2 variants in *A. vulgaris* were confirmed by direct sequencing of PCR products. The sequencing trace from *A. vulgaris* shows double peaks at some bases, and these double peaks correspond to the different ITS2 variants in *A. vulgaris*. The bases with double peaks are boxed in red. **(E-H)** The variants as molecular fossils of *A. sibirica* were confirmed by cloning of PCR products.

**Figure S5A.**

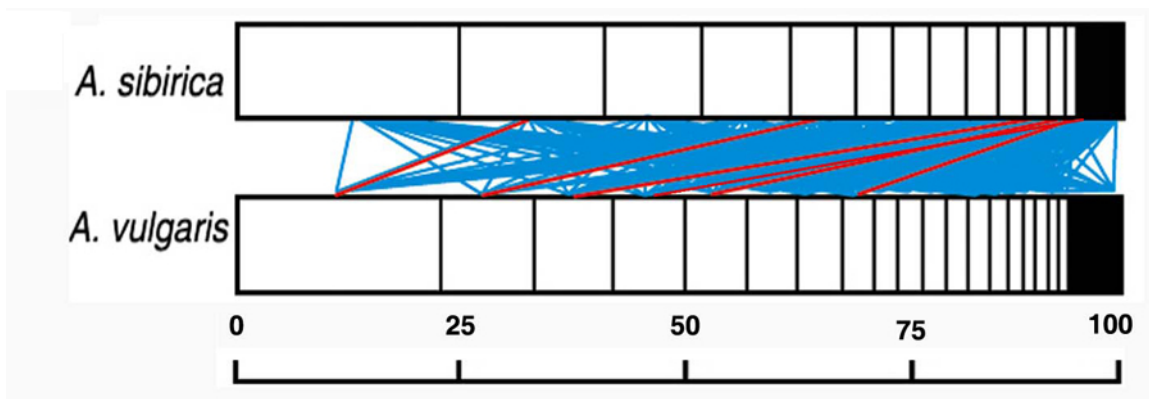

Figure S5B.

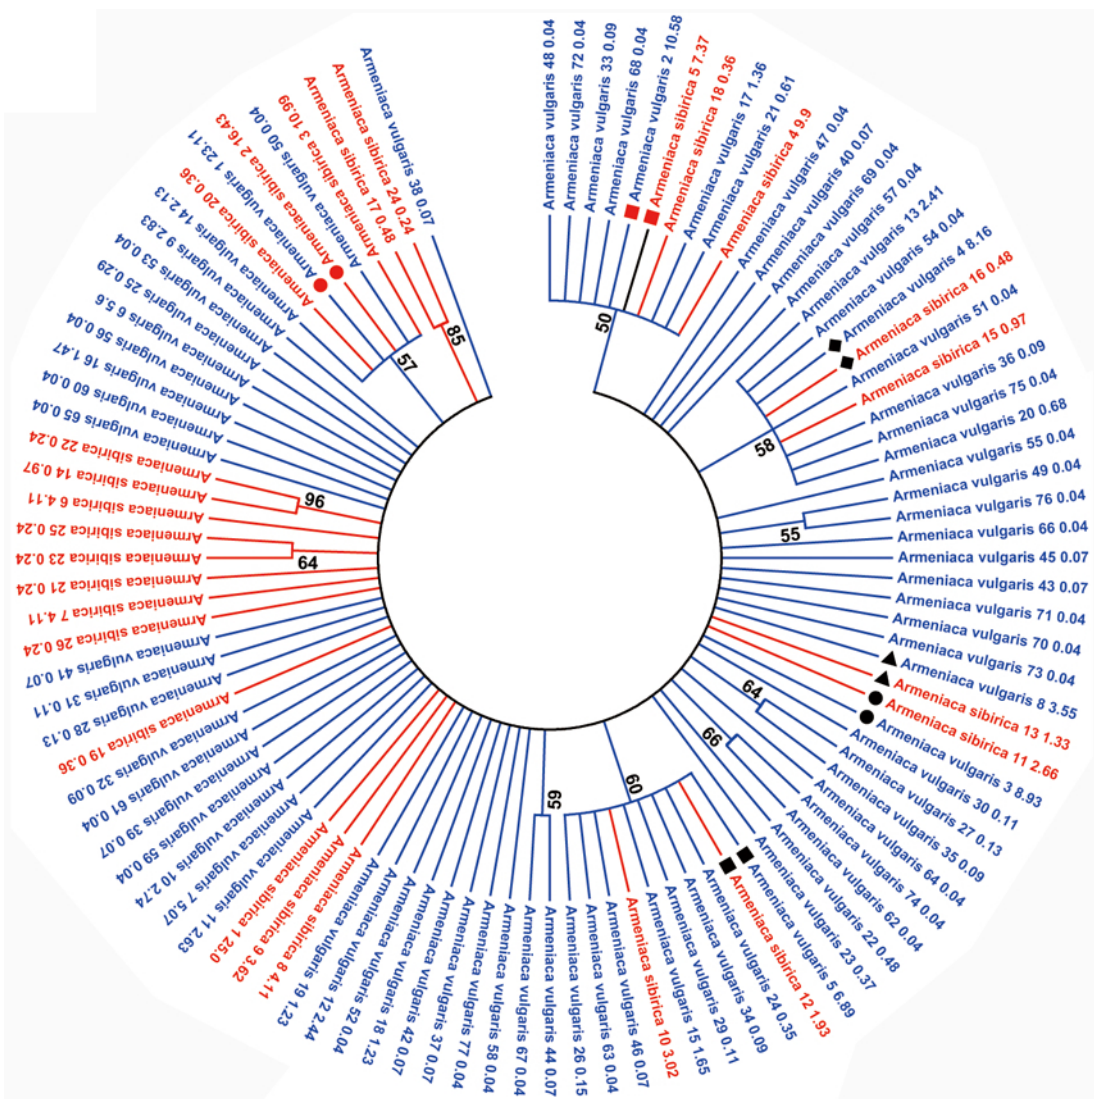

Figure S5C.

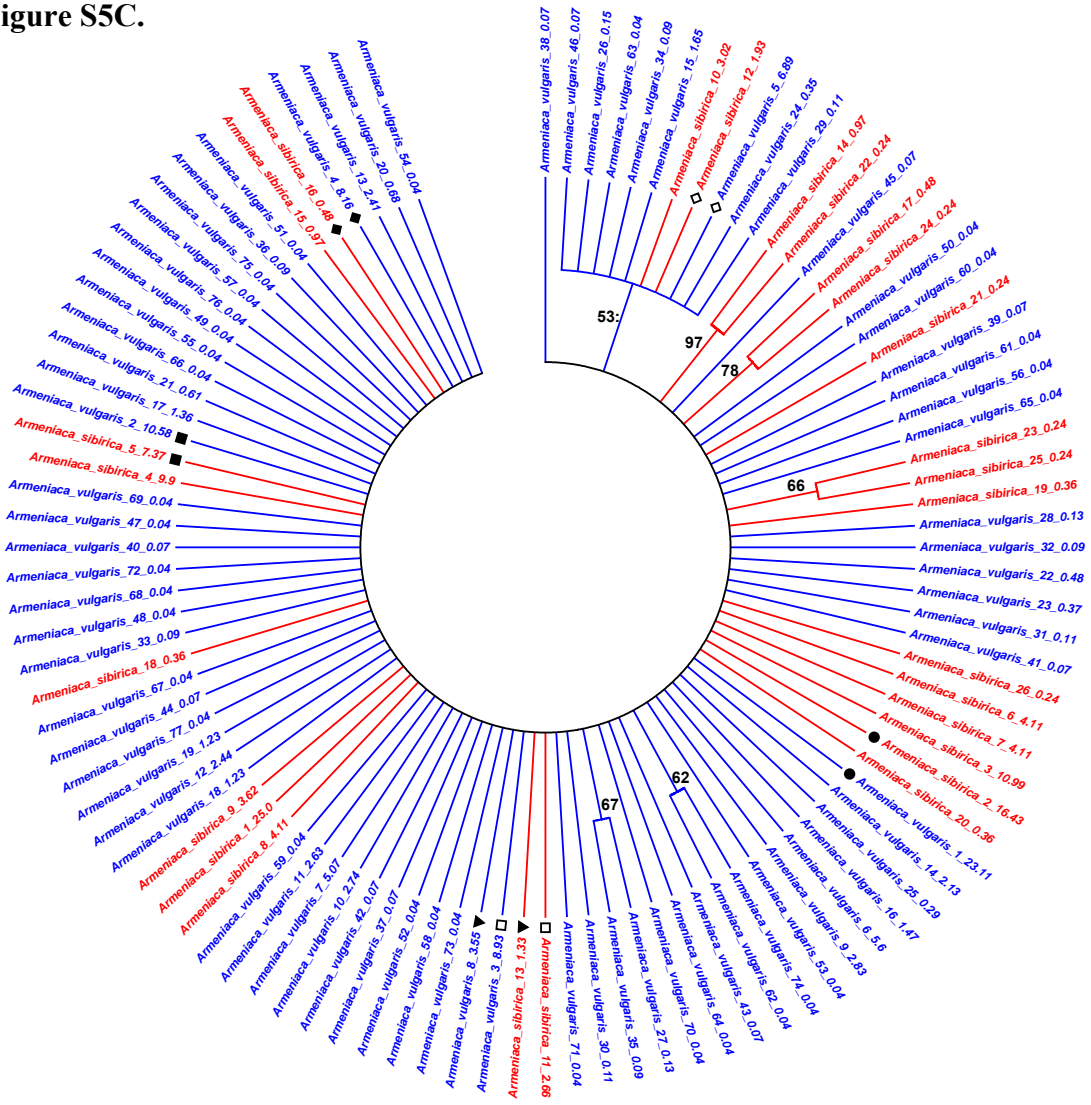

Figure S5D.

*Armeniacia vulgaris*

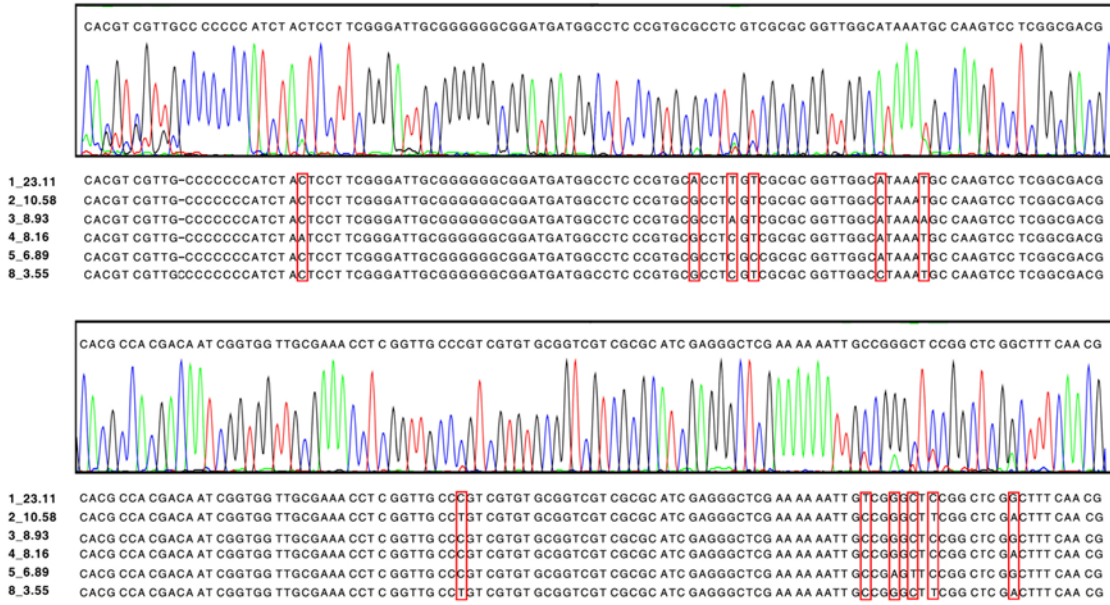

Figure S5E.

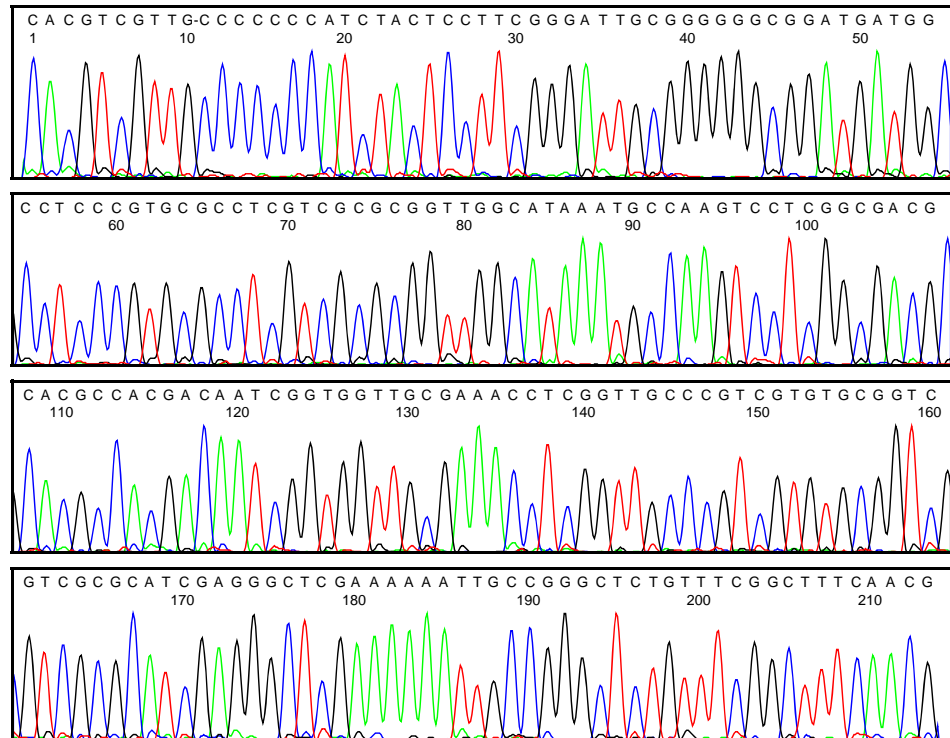

**Figure S5F.**

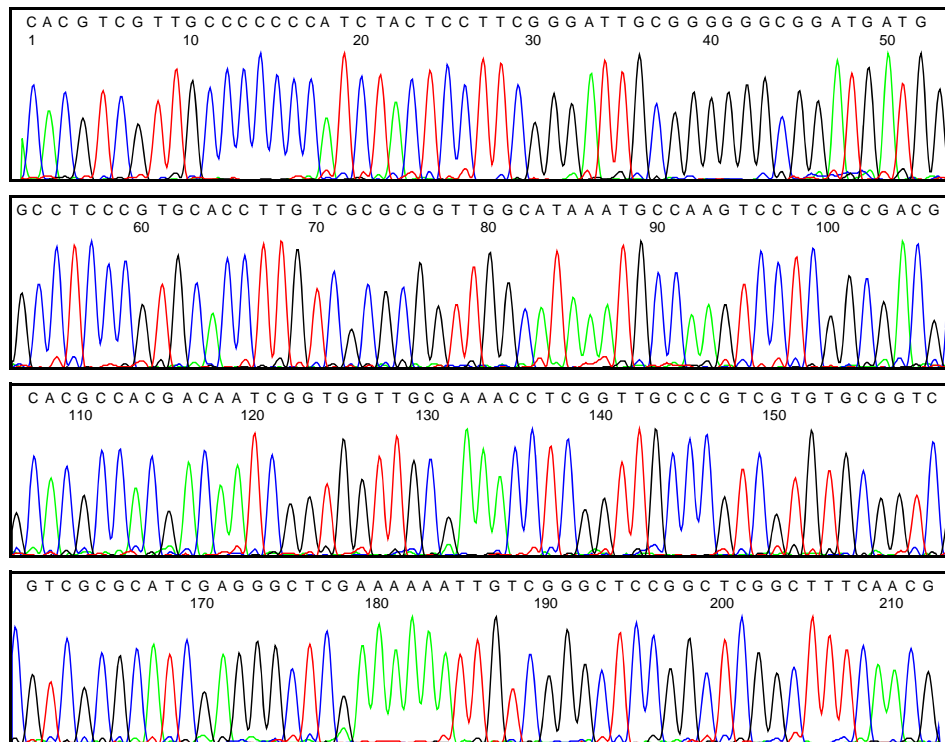

**Figure S5G.**

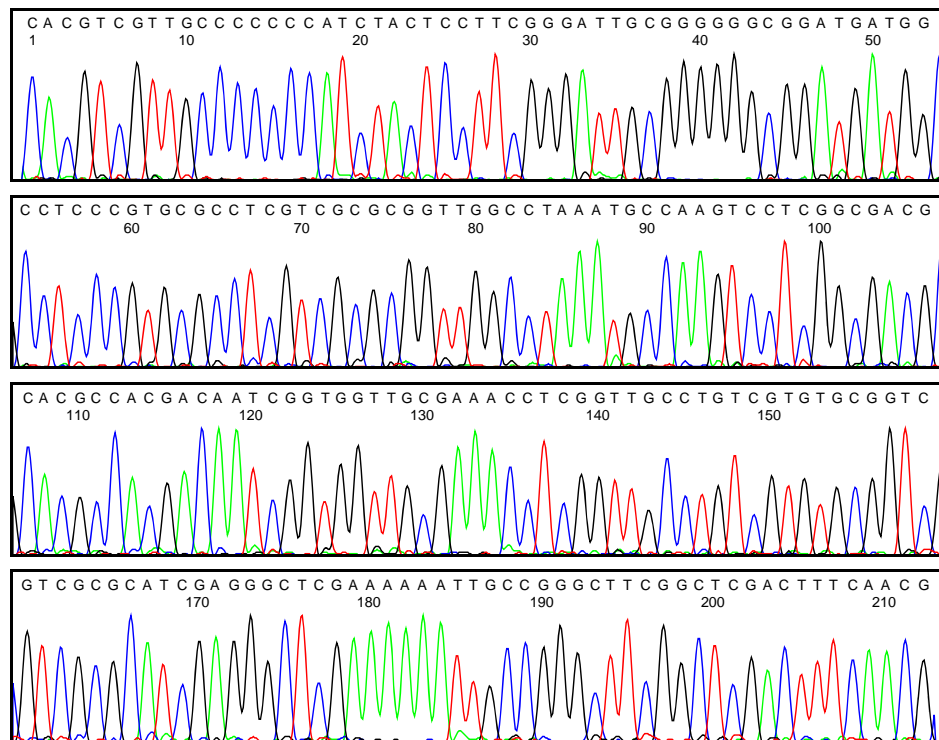

**Figure S5H.**

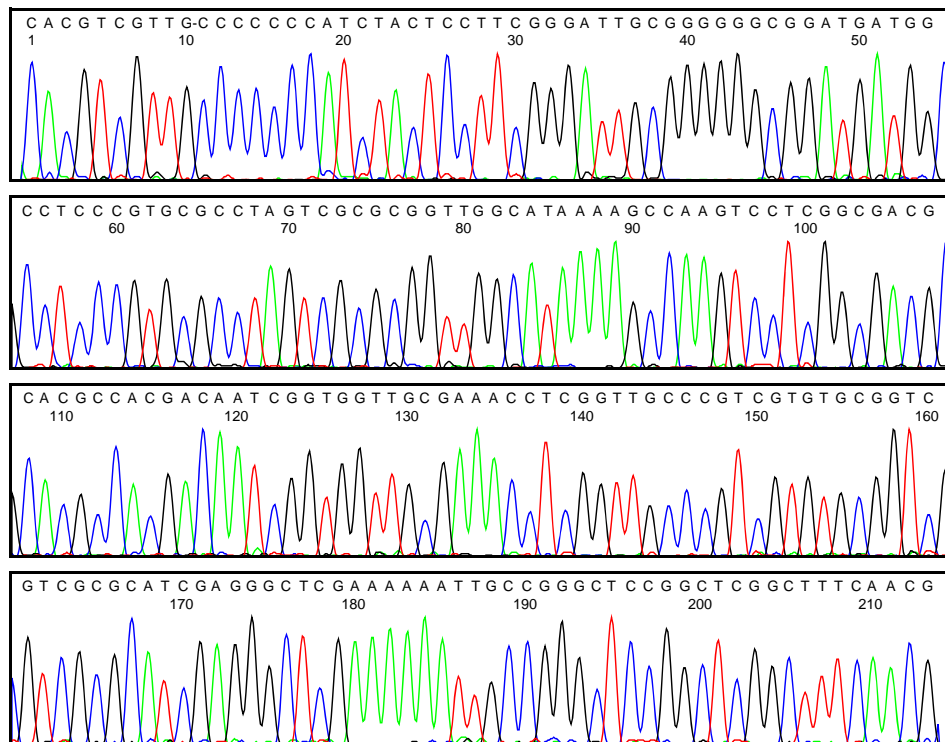

Supplement: pone.0043971.s005.pdf [file pone.0043971.s005.pdf]
