# Supplementary material for: Extensive Pyrosequencing Reveals Frequent Intra-Genomic Variations of Internal Transcribed Spacer Regions of Nuclear Ribosomal DNA
Source: PubMed Central journal article supplement (PMC3431384; doi:10.1371/journal.pone.0043971), 2012-08-30

**Figure S2.** Ego r ctkuqp"qh'KVU4'xctkcpw'htqo "eqo r ngvf "i gpqo g'ugs wpeg'f cvc."emlpxi f cvc"cpf '676'r {tqugs wpegkpi 'f cvc0Hqt'gcej 'ur geku."cp'wptqqvfg 'P gli j dqt/Lqkpkpi 'tgg uj qy u'vj g'f kxgtuk{\ "qh'KVU4'xctkcpw0Gcej 'dtcpej 'tgr tgugpu'cp'KVU4'xctkcpv."rdgrgf "y kj yj g'uco r ng'pwo dgt 'hqmy gf 'd{ 'yj g'tcpmlqh'yj g'xctkcpv."TXC"qh'yj g'xctkcpv."cpf 'yj g'ngwt \*I .E"qt'H0Vj g'ngwt'I "kpf kecvgu'c'xctkcpv'f gtxgf 'htqo "eqo r ngvf "i gpqo g'ugs wpeg'f cvc0 Vj g'ngwt'E'tgr tgugpu'c'xctkcpv'f gtxgf 'htqo "emlpxi 'f cvc0Vj g'ngwt'H'tgr tgugpu'c'xctkcpv f gtxgf 'htqo 676'f cvc0(A)"Wptqqvfg 'tgg'qh'KVU4'xctkcpw'lp" Ct cdf qruku'yj crkpc0(B) Wptqqvfg 'tgg'qh'KVU4'xctkcpw'lp"Qt{/c'ucvxc"uur 0lcr qpkc0(C)"Wptqqvfg 'tgg'qh'KVU4 xctkcpw'lp"Qt{/c'ucvxc"uur 0lpf kec0(D)"Wptqqvfg 'tgg'qh'KVU4'xctkcpw'lp"Rqr wmu vkejqectrc0(E)"Wptqqvfg 'tgg'qh'KVU4'xctkcpw'lp"\ gc'bo c{u0' "

**Figure S2A.**

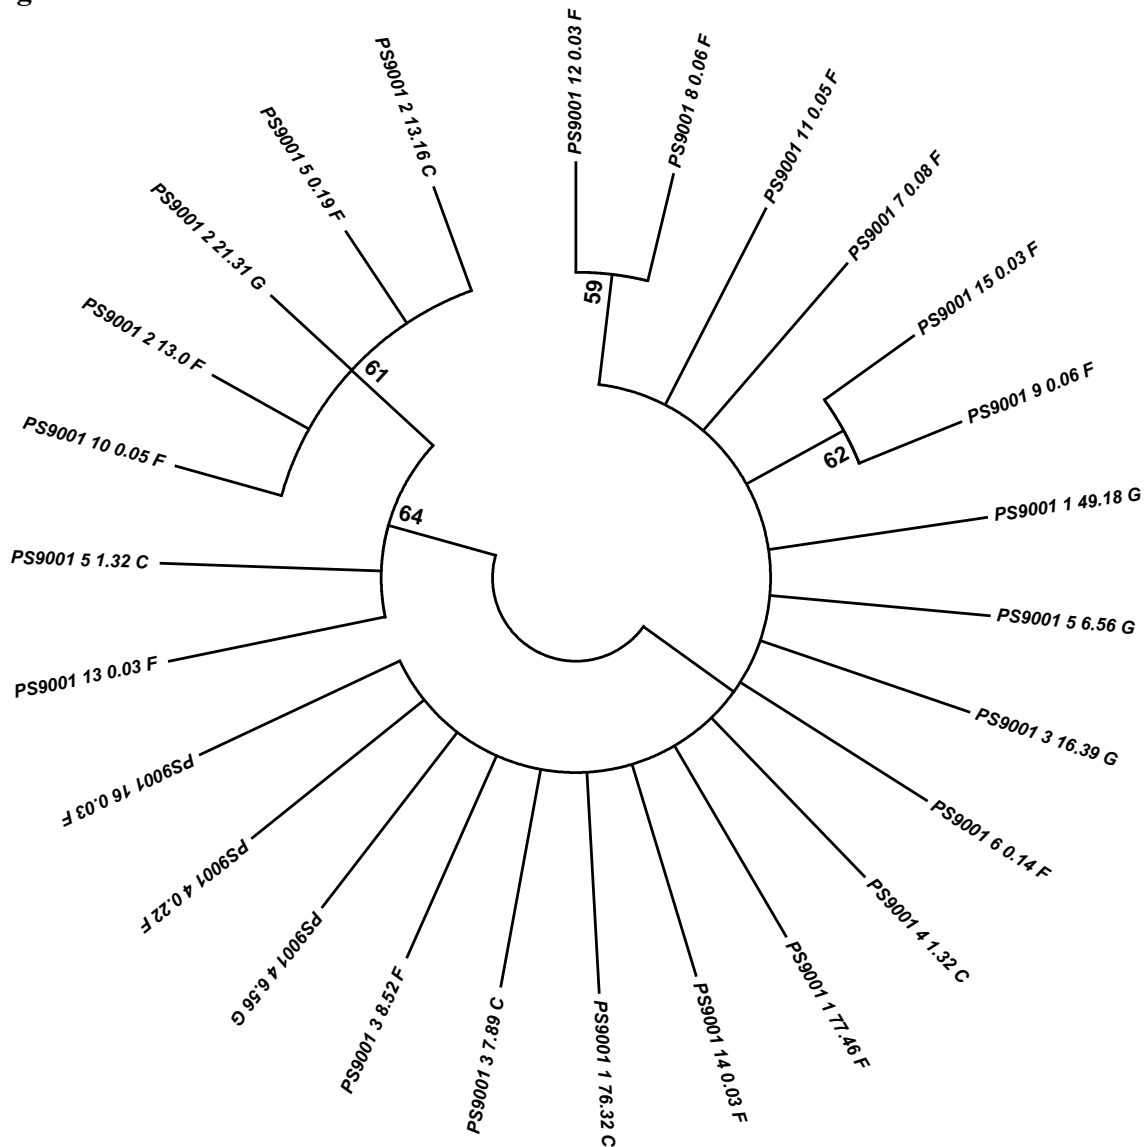

Figure S2B.

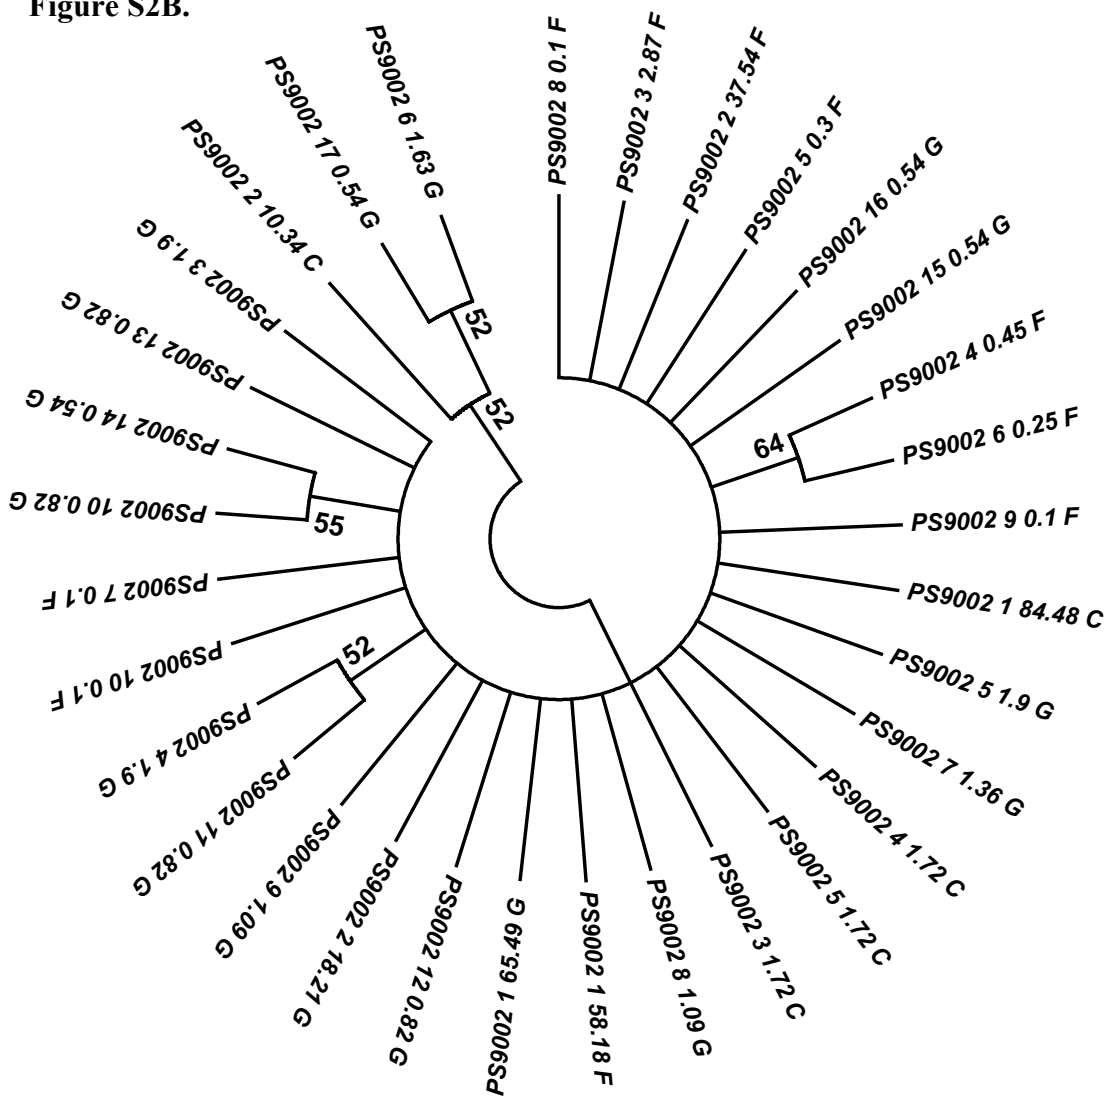

Figure S2C.

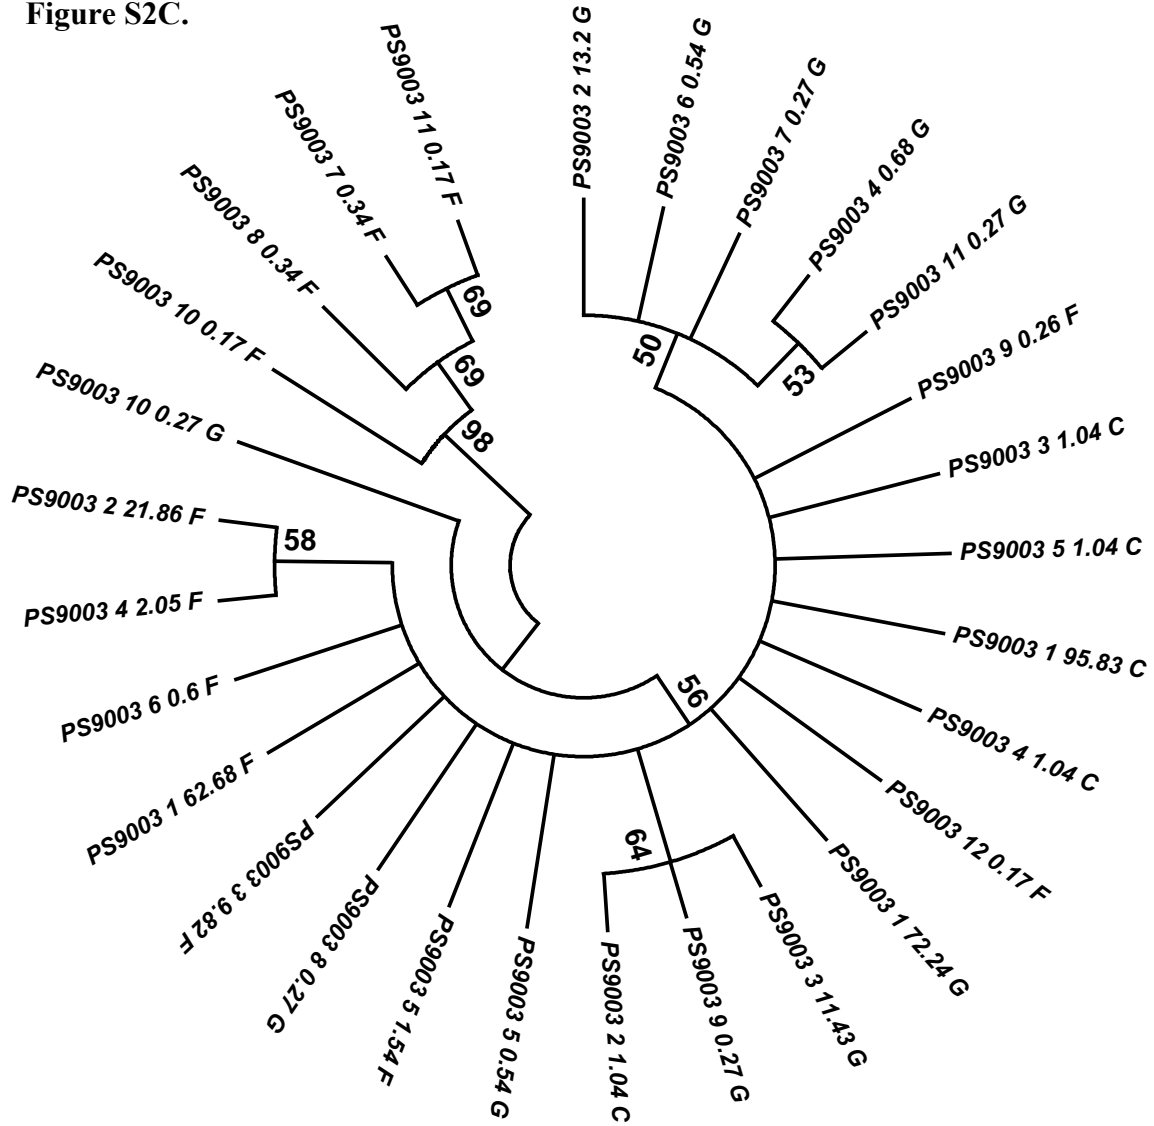

Figure S2D.

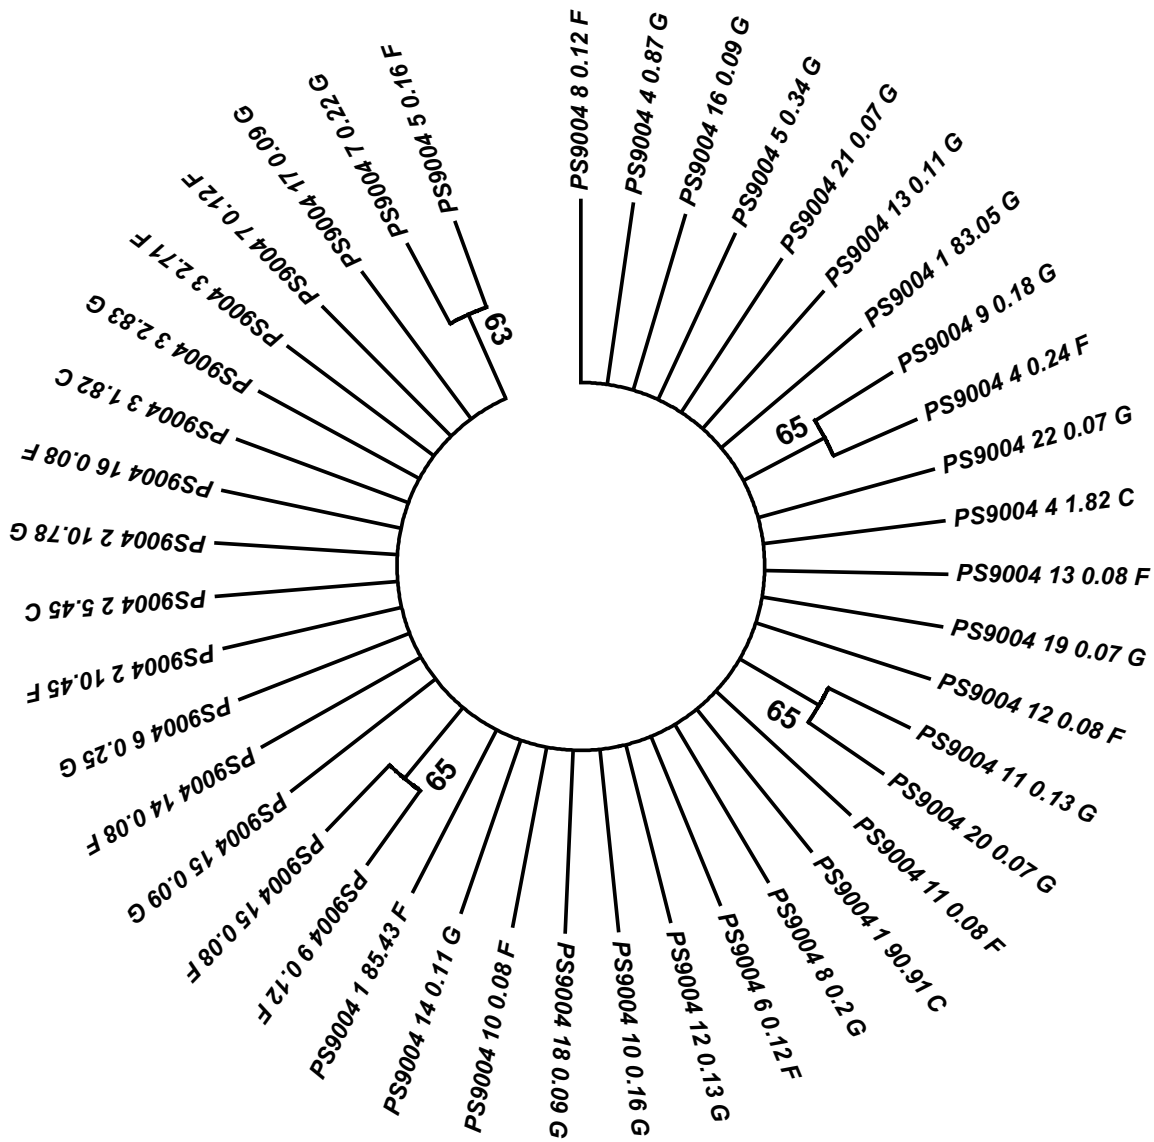

Figure S2E.

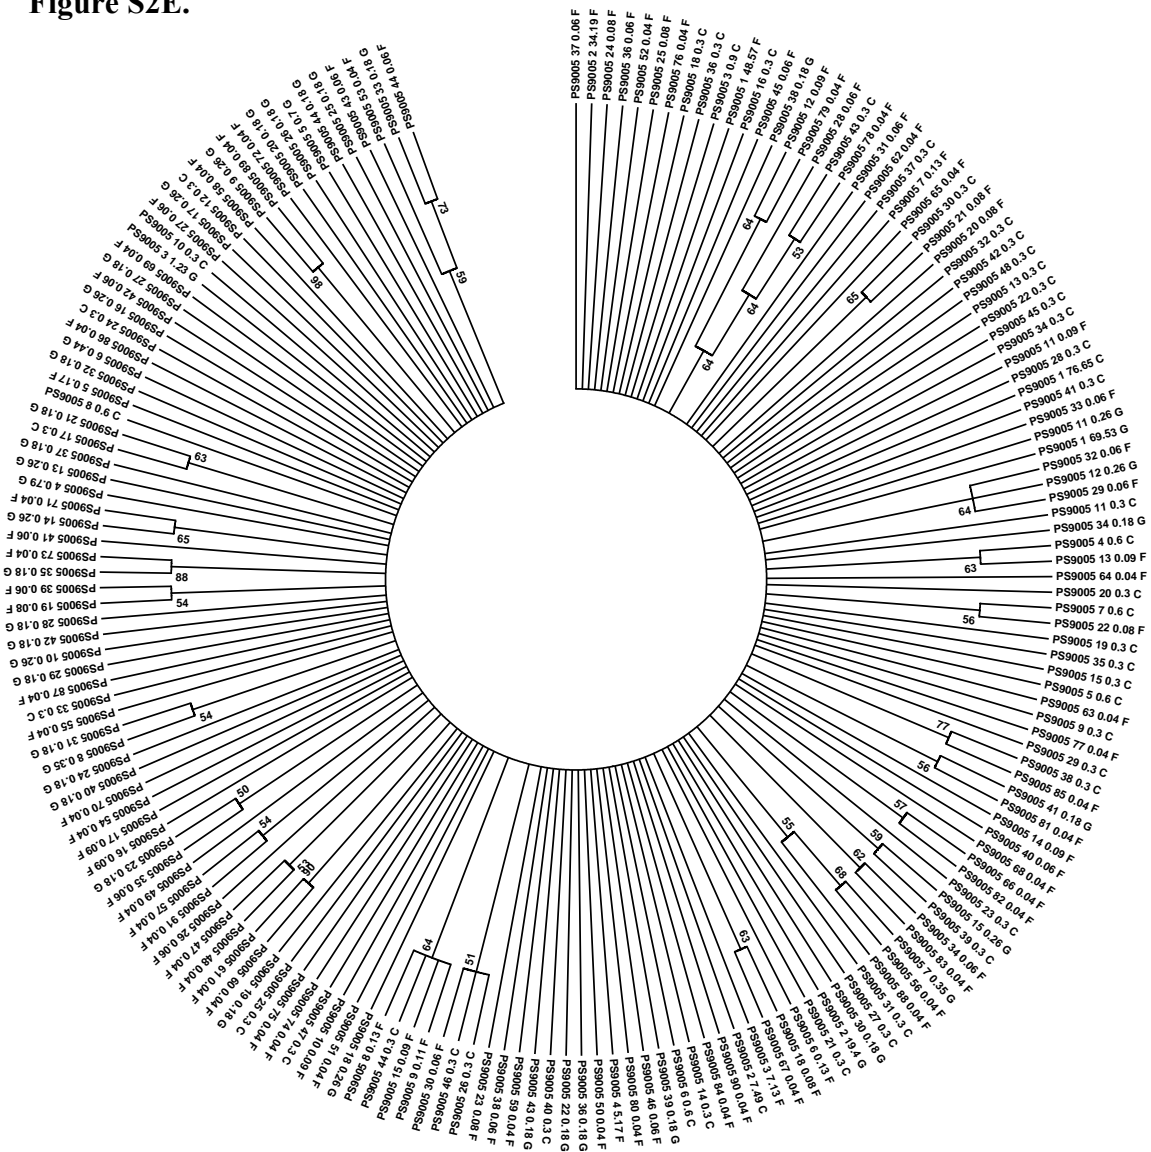

Supplement: pone.0043971.s002.pdf [file pone.0043971.s002.pdf]
