# Supplementary material for: Extensive Pyrosequencing Reveals Frequent Intra-Genomic Variations of Internal Transcribed Spacer Regions of Nuclear Ribosomal DNA
Source: PubMed Central journal article supplement (PMC3431384; doi:10.1371/journal.pone.0043971), 2012-08-30

**Hi wt'U50** Unrooted Maximum Parsimony trees displaying the evolutionary mechanisms of intra-genomic ITS2 variants in plant genomes. **\*C+**The concerted evolution mechanism. *Panax ginseng* is used as an example. The red line indicates the most major variant. **\*D+**The birth-and-death evolution mechanism. *Arabidopsis thaliana* is used as an example. The red lines indicate the two main variant clusters. **\*E+**The divergent evolution mechanism. *Solanum lyratum* is used as an example. The red lines indicate multiple clusters of variants.

**Hi wt'U5A.**

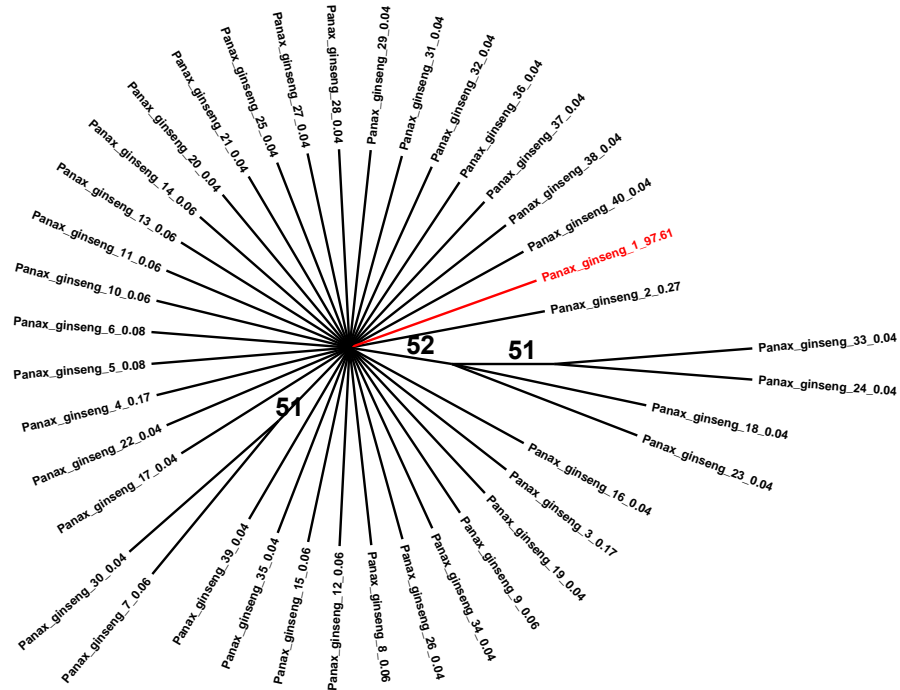

**Hi wt'U5B.**

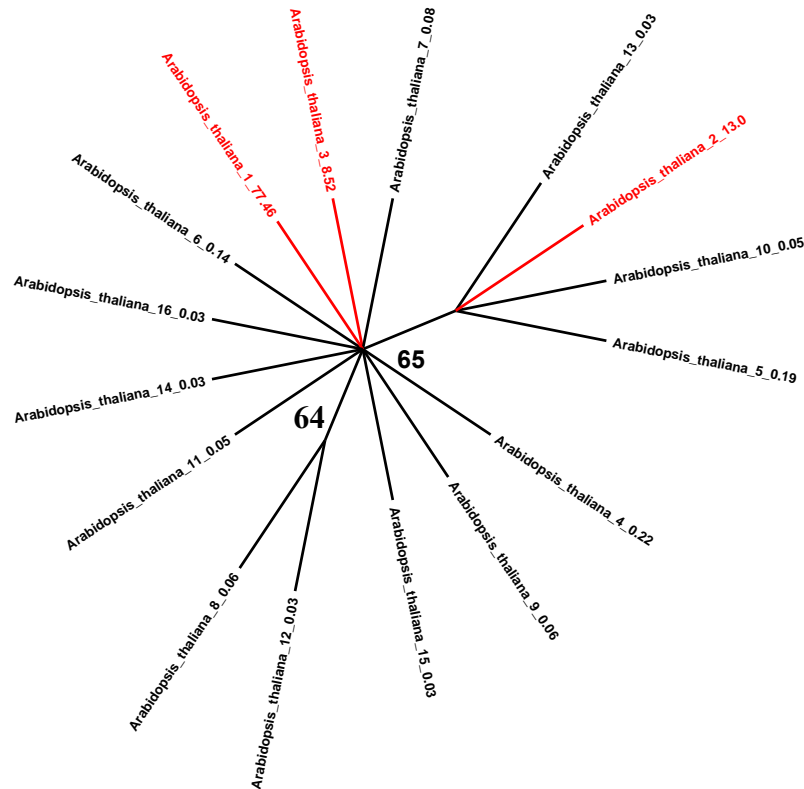

Supplement: pone.0043971.s003.pdf [file pone.0043971.s003.pdf]
