# Supplementary material for: Extensive Pyrosequencing Reveals Frequent Intra-Genomic Variations of Internal Transcribed Spacer Regions of Nuclear Ribosomal DNA
Source: PubMed Central journal article supplement (PMC3431384; doi:10.1371/journal.pone.0043971), 2012-08-30

**Figure S4.** Two identical variants of ITS2 in the genera *Panax* and *Eleutherococcus* of Araliaceae. **(A)** The Maximum Parsimony (MP) tree of ITS2 in Araliaceae. One minor variant of ITS2 in *Eleutherococcus giraldii* showed close affinity to the ITS2 variants of *Panax ginseng* and was clustered with them. **(B)** This ITS2 variant, which was the major variant in the *Panax ginseng* genome but minor in *Eleutherococcus giraldii*, was confirmed by direct sequencing of PCR products using specific primers. The sequencing trace from *E. giraldii* shows double peaks at some bases, and these double peaks correspond to the major ITS2 variant in *P. ginseng*. The bases having double peaks are boxed in red.

**Figure S4A.**

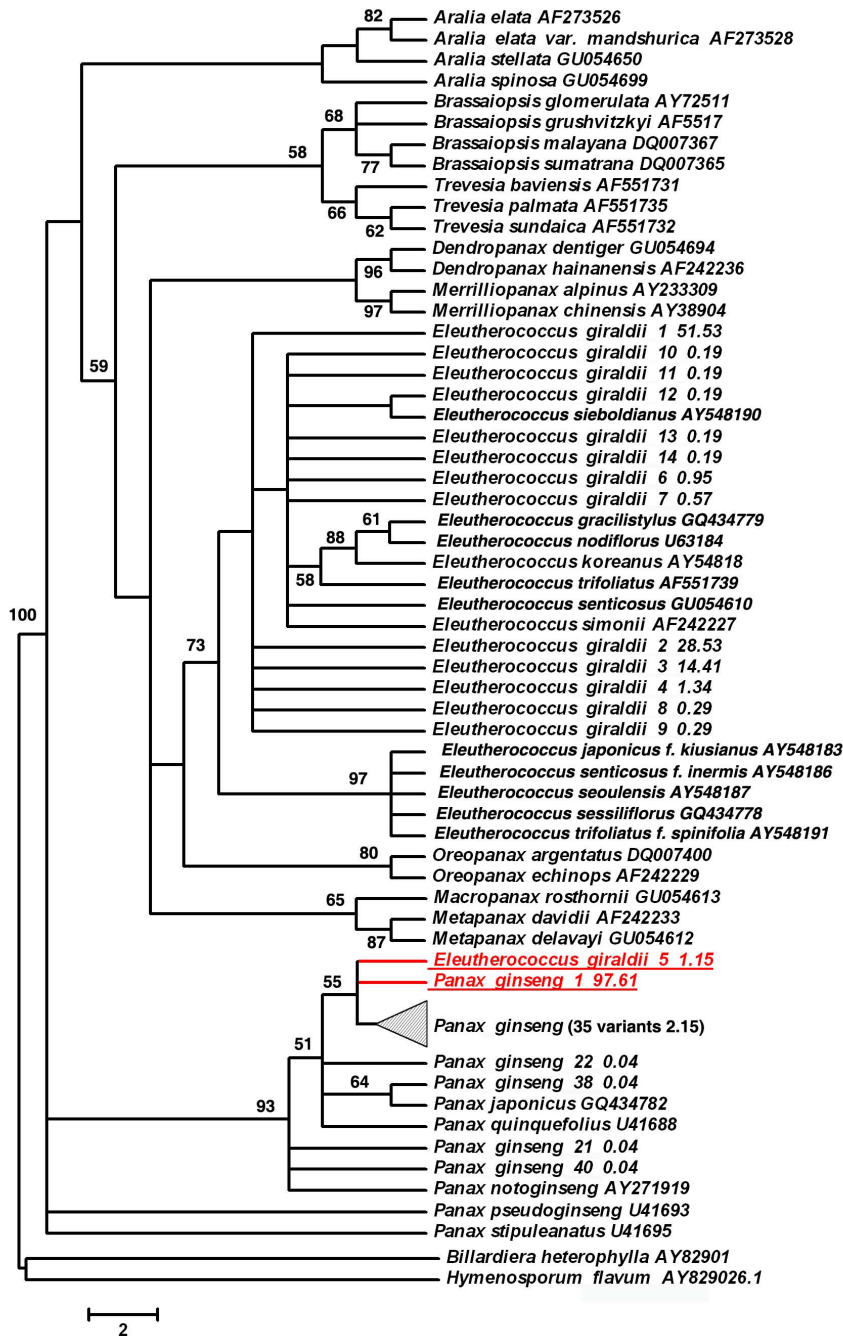

Figure S4B.

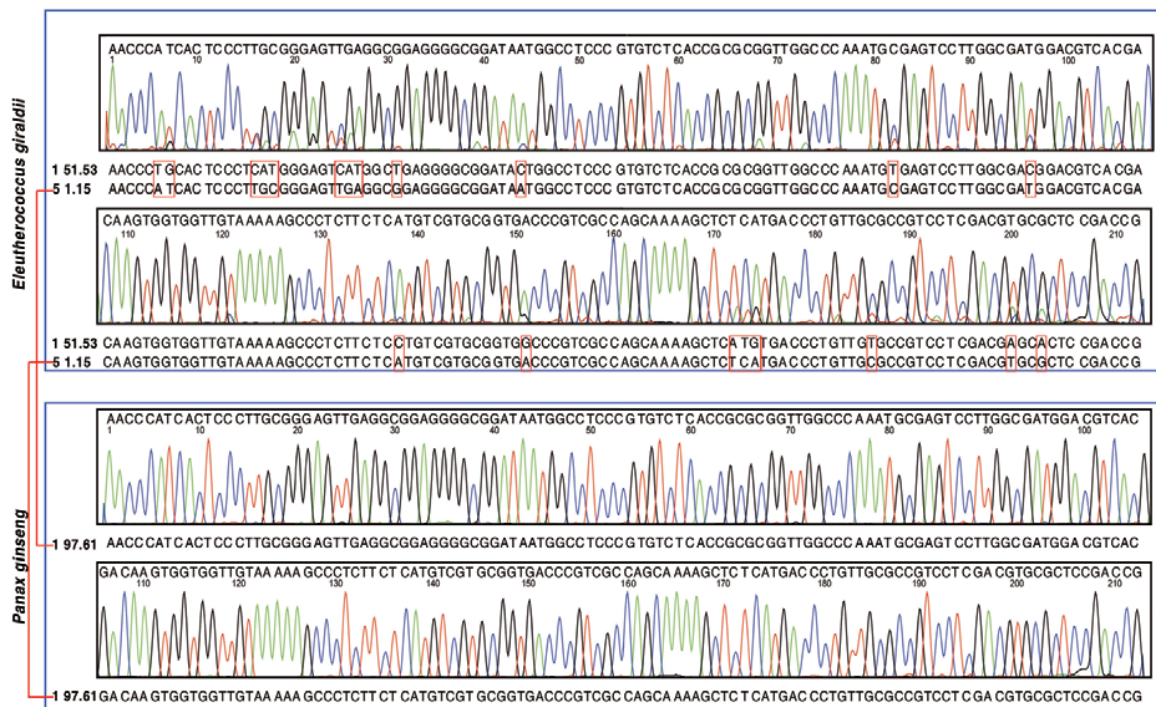

Supplement: pone.0043971.s004.pdf [file pone.0043971.s004.pdf]
