# Supplementary material for: Extensive Pyrosequencing Reveals Frequent Intra-Genomic Variations of Internal Transcribed Spacer Regions of Nuclear Ribosomal DNA
Source: PubMed Central journal article supplement (PMC3431384; doi:10.1371/journal.pone.0043971), 2012-08-30

"

**Figure S6.** " Vj g'xctkcpv'ctg'rkpngf 'wukpi 'tgr 'cpf 'dmg'rkpgu'cv'322' 'cpf "; 7' 'kf gpvklgu." tgr gevkgf 0Gcej 'qr gp'dqz'tgr tgu'pwa'c'ukpi ng'xctkcpv'y kj 'TxC'qxgt'3' . 'cpf 'gcej uqikf 'dqz'tgr tgu'pwa'y g'xctkcpv'y kj 'TxC'rguu'y cp'3' 0Vj g'twgtu'uj qy 'y' g'TxC'kp" r gtegpvi g0(A)"*Epimedium*"\*Dgt dgt kf cecg+0(B)"*Inula*"\*Cvgt cecg+0(C)"*Ipomoea*" \*Eqpxqkwrcecg+0(D)"*Panax*"\*Ctck cecg+0(E)"*Pinus*"\*Rkpcecg+0 "

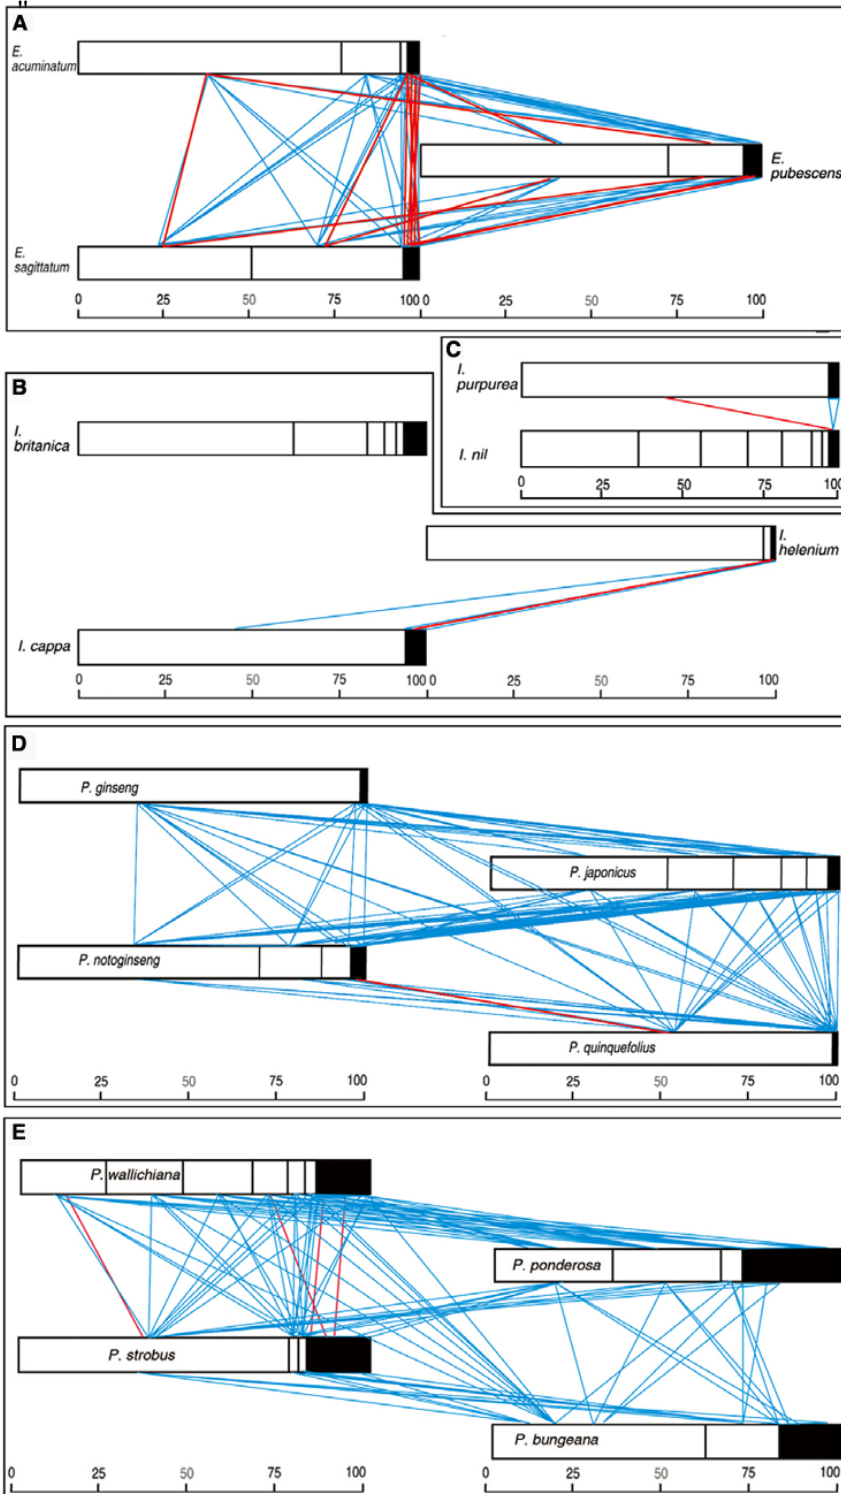

Supplement: pone.0043971.s006.pdf [file pone.0043971.s006.pdf]
