# Supplementary material for: Extensive Pyrosequencing Reveals Frequent Intra-Genomic Variations of Internal Transcribed Spacer Regions of Nuclear Ribosomal DNA
Source: PubMed Central journal article supplement (PMC3431384; doi:10.1371/journal.pone.0043971), 2012-08-30

"

**Hli wt g'U: 0' "** Vj g'P gki j dqt/Lqkpi "tgg'qh'KVU4'xctkpwu'qh'hqwt "ur geku'kp"vj g'i gpwu  
*Ilex*\*Cswkqkcegcg-0Vj g'uco g'eqmtu'tgr tguvp'vj g'uco g'ur geku'0Vj g'Ncwp'pco gu'qh"  
ur geku'ctg'hqmy gf "d{ 'vj g'tcpn'c'pf "TXC"qh'vj g'xctkpwu0 "

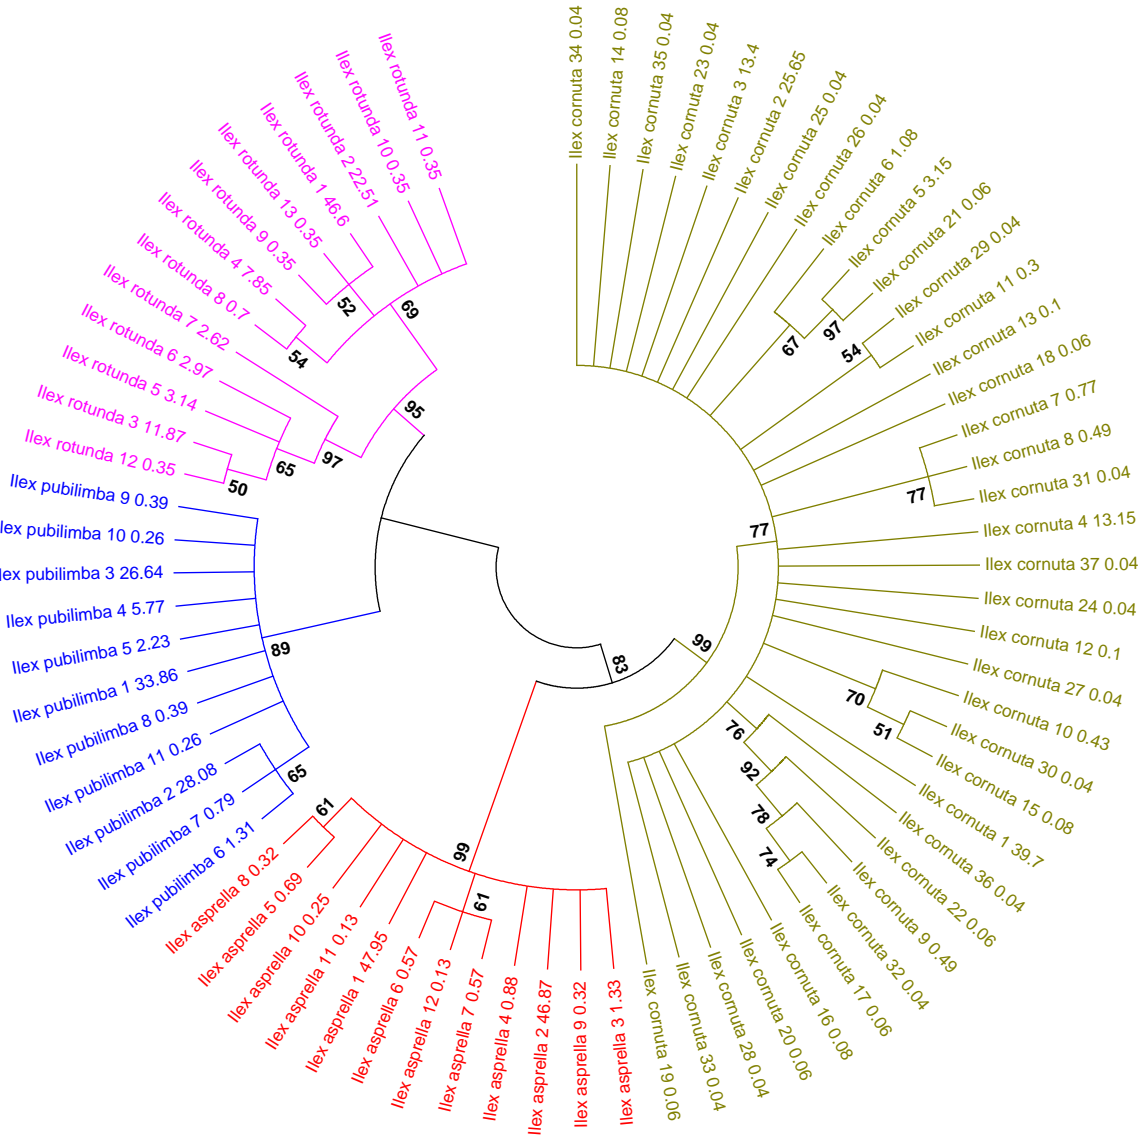

Supplement: pone.0043971.s008.pdf [file pone.0043971.s008.pdf]
