# Supplementary material for: Extensive Pyrosequencing Reveals Frequent Intra-Genomic Variations of Internal Transcribed Spacer Regions of Nuclear Ribosomal DNA
Source: PubMed Central journal article supplement (PMC3431384; doi:10.1371/journal.pone.0043971), 2012-08-30

**Figure 1.** The Neighbor-Joining tree of ITS2 variants in the genera **(A)** *Astragalus* (Fabaceae), **(B)** *Clerodendrum* (Verbenaceae), and **(C)** *Euphorbia* (Euphorbiaceae). The same colors represent the same species. The Latin names of species are followed by the rank and RVA of the variants.

**Figure 1; A.**

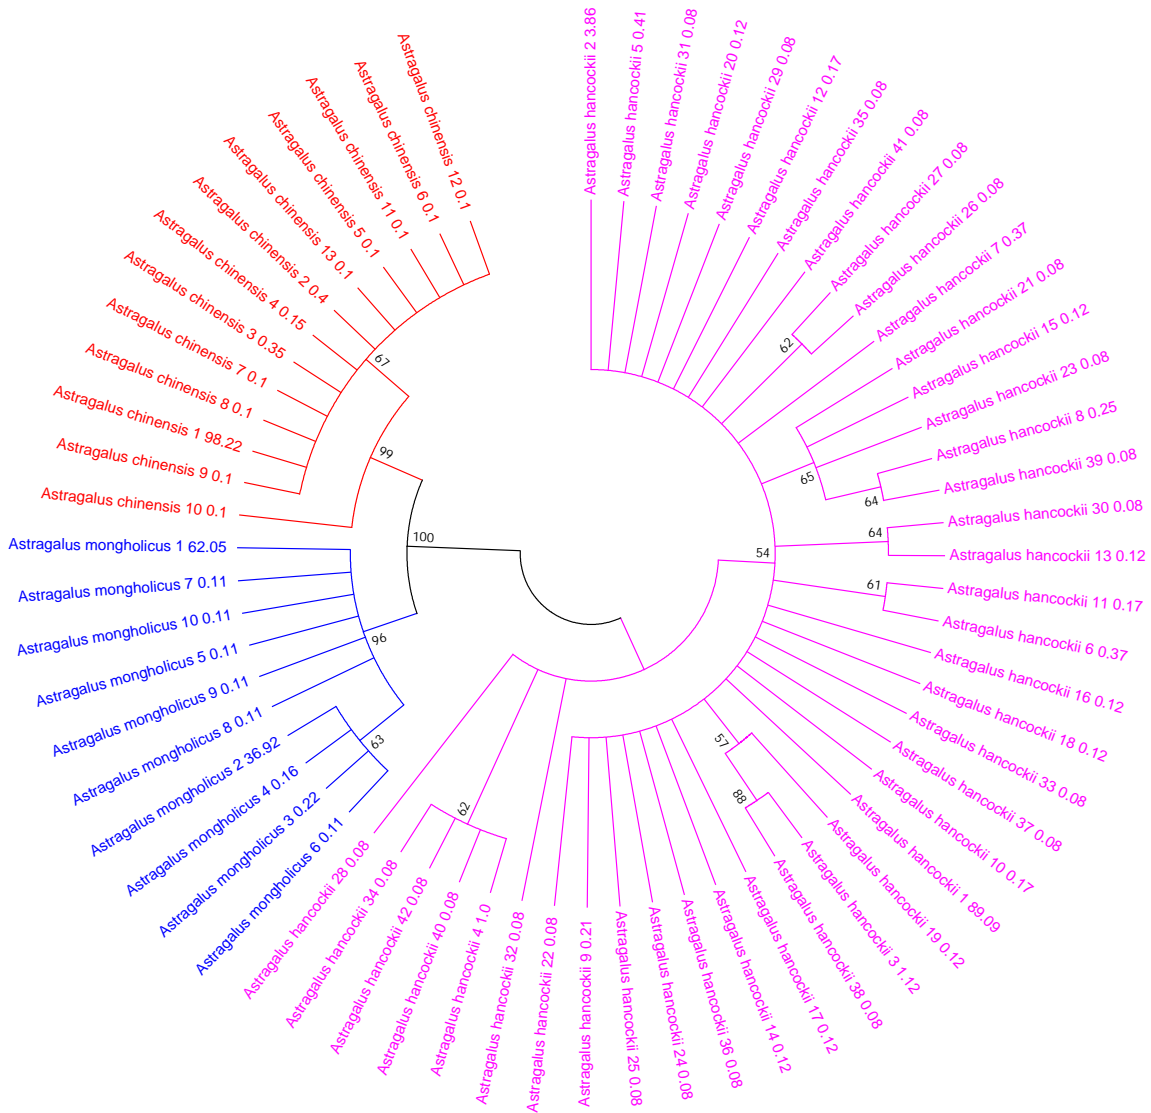



Figure S9C.

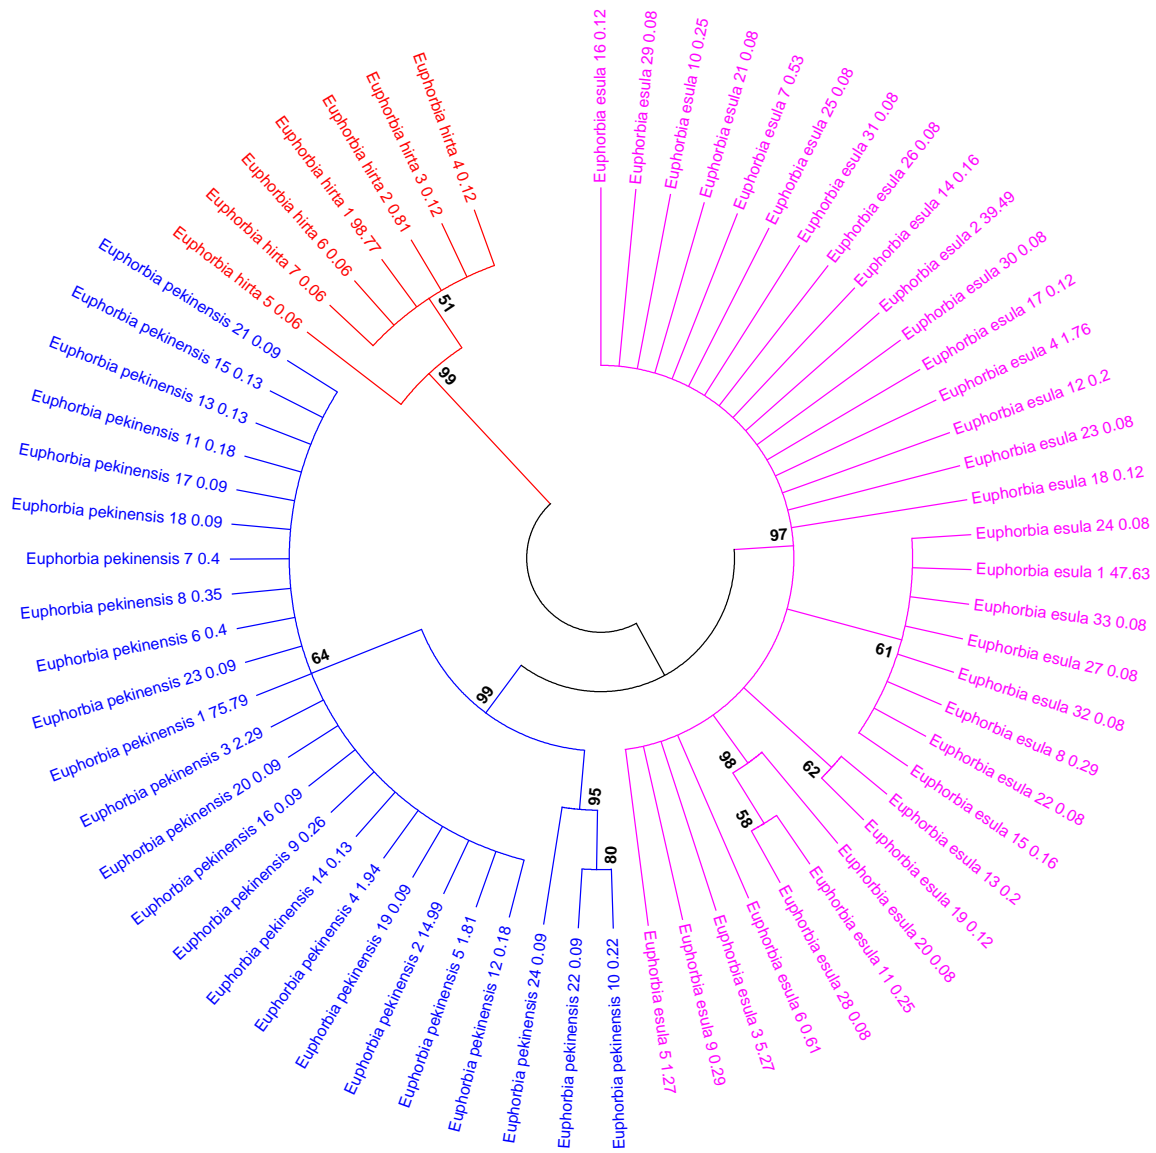

Supplement: pone.0043971.s009.pdf [file pone.0043971.s009.pdf]
