# Supplementary material for: Extensive Pyrosequencing Reveals Frequent Intra-Genomic Variations of Internal Transcribed Spacer Regions of Nuclear Ribosomal DNA
Source: PubMed Central journal article supplement (PMC3431384; doi:10.1371/journal.pone.0043971), 2012-08-30

**Figure S10.** The work flow for the processing and analysis of pyrosequencing reads.

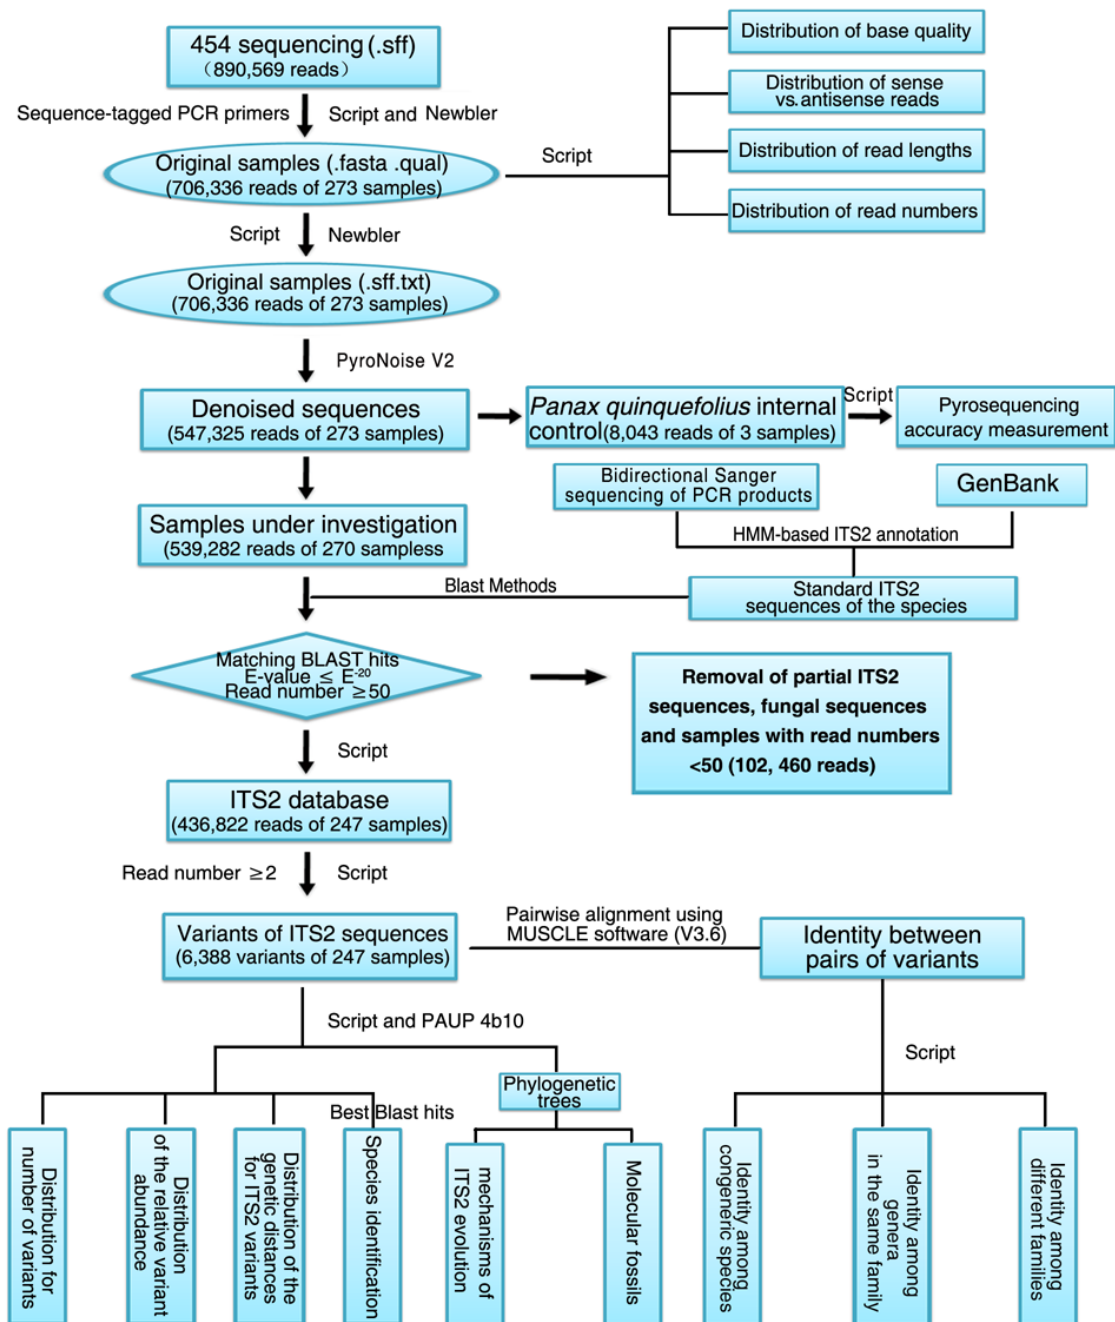

Supplement: pone.0043971.s010.pdf [file pone.0043971.s010.pdf]
