# Supplementary material for: Extensive Pyrosequencing Reveals Frequent Intra-Genomic Variations of Internal Transcribed Spacer Regions of Nuclear Ribosomal DNA
Source: PubMed Central journal article supplement (PMC3431384; doi:10.1371/journal.pone.0043971), 2012-08-30
Supplement: pone.0043971.s011.pdf [file pone.0043971.s011.pdf]

**Table S1.** Determining the pyrosequencing error rate using known *Panax quinquefolius* sequences as internal controls.

| <i>Panax</i><br><i>Quinquefolius</i><br>Sample Number | Length of<br>Sample<br>(bp) | Number<br>of Reads | Base-Level<br>Error Rate | Sequence-Level<br>Error Rate |
|-------------------------------------------------------|-----------------------------|--------------------|--------------------------|------------------------------|
| 1                                                     | 187                         | 5263               | 1.30E-04                 | 1.18E-02                     |
| 2                                                     | 350                         | 124                | 9.22E-05                 | 1.61E-02                     |
| 3                                                     | 174                         | 2633               | 1.64E-04                 | 2.58E-02                     |
| Average                                               | 237                         | 2673               | 1.29E-04                 | 1.79E-02                     |
