# Supplementary material for: Extensive Pyrosequencing Reveals Frequent Intra-Genomic Variations of Internal Transcribed Spacer Regions of Nuclear Ribosomal DNA
Source: PubMed Central journal article supplement (PMC3431384; doi:10.1371/journal.pone.0043971), 2012-08-30
Supplement: pone.0043971.s012.pdf [file pone.0043971.s012.pdf]

**Table S2.** The evolutionary mechanisms of ITS2 variants across 178 plant species under investigation.

| Evolutionary mechanism | Species number | Percentage (%) |
|------------------------|----------------|----------------|
| Concerted              | 117            | 65.7           |
| Birth and Death        | 48             | 27.0           |
| Divergent              | 13             | 7.3            |
| Total                  | 178            | 100            |
