# Supplementary material for: Extensive Pyrosequencing Reveals Frequent Intra-Genomic Variations of Internal Transcribed Spacer Regions of Nuclear Ribosomal DNA
Source: PubMed Central journal article supplement (PMC3431384; doi:10.1371/journal.pone.0043971), 2012-08-30
Supplement: pone.0043971.s013.pdf [file pone.0043971.s013.pdf]

**Table S3.** ITS2 variants which have been verified by PCR products cloned or directly sequenced.

| ITS2 variant*                                    | Method | Confirmed<br>(clone number) |
|--------------------------------------------------|--------|-----------------------------|
| <i>Alpinia_hainanensis_1_33.84</i>               | Clone  | Yes(2)                      |
| <i>Alpinia_hainanensis_2_30.06</i>               | Clone  | Yes(2)                      |
| <i>Alpinia_hainanensis_3_28.78</i>               | Clone  | Yes(5)                      |
| <i>Brucea_javanica_1_89.32</i>                   | PCR    | Yes                         |
| <i>Brucea_mollis_1_62.64</i>                     | PCR    | Yes                         |
| <i>Cerasus_glandulosa_1_14.08</i>                | Clone  | Yes(9)                      |
| <i>Cerasus_glandulosa_6_10.52</i>                | Clone  | Yes(16)                     |
| <i>Cerasus_glandulosa_7_6.26</i>                 | Clone  | Yes(6)                      |
| <i>Cerasus_glandulosa_8_3.56</i>                 | Clone  | No                          |
| <i>Cerasus_glandulosa_10_2.7</i>                 | Clone  | Yes(1)                      |
| <i>Cerasus_glandulosa_12_2.24</i>                | Clone  | No                          |
| <i>Cerasus_japonica_1_20.47</i>                  | Clone  | Yes(15)                     |
| <i>Cerasus_japonica_6_8.84</i>                   | Clone  | Yes(7)                      |
| <i>Cerasus_japonica_7_8.42</i>                   | Clone  | Yes(6)                      |
| <i>Cerasus_japonica_8_4.92</i>                   | Clone  | Yes(3)                      |
| <i>Cerasus_japonica_10_2.64</i>                  | Clone  | No                          |
| <i>Cerasus_japonica_11_1.78</i>                  | Clone  | No                          |
| <i>Citrus_limonum_1_45.53</i>                    | PCR    | Yes                         |
| <i>Citrus_maxima_3_8.37</i>                      | PCR    | Yes                         |
| <i>Citrus_medica_1_75.75</i>                     | PCR    | Yes                         |
| <i>Citrus_reticulata_3_17.46</i>                 | PCR    | Yes                         |
| <i>Epimedium_acuminatum_1_77.27</i>              | PCR    | Yes                         |
| <i>Epimedium_pubescens_1_72.55</i>               | PCR    | Yes                         |
| <i>Epimedium_pubescens_2_21.97</i>               | PCR    | Yes                         |
| <i>Epimedium_sagittatum_1_50.86</i>              | PCR    | Yes                         |
| <i>Epimedium_sagittatum_2_44.44</i>              | PCR    | Yes                         |
| <i>Ipomoea_purpurea_1_97.87</i>                  | PCR    | Yes                         |
| <i>Ligusticum_jeholense_1_28.63</i>              | PCR    | Yes                         |
| <i>Ligusticum_jeholense_2_22.29</i>              | PCR    | Yes                         |
| <i>Ligusticum_sinense_1_42.72</i>                | PCR    | Yes                         |
| <i>Ligusticum_sinense_2_36.02</i>                | PCR    | Yes                         |
| <i>Ligusticum_sinense_4_4.84</i>                 | PCR    | Yes                         |
| <i>Ligusticum_sinense_cv._Chuanxiong_1_40.92</i> | PCR    | Yes                         |
| <i>Ligusticum_sinense_cv._Chuanxiong_3_11.2</i>  | PCR    | Yes                         |

|                                          |                 |     |
|------------------------------------------|-----------------|-----|
| Panax_quinquefolius_1_98.44              | PCR             | Yes |
| Pinus_strobilus_1_77.01                  | PCR             | Yes |
| Pinus_wallichiana_1_24.24                | PCR             | Yes |
| Pinus_wallichiana_4_9.44                 | PCR             | Yes |
| Potentilla_chinensis_6_4.72              | Specific Primer | Yes |
| Potentilla_nivea_4_2.27                  | Specific Primer | Yes |
| Torreya_fargesii_var._yunnanensis_1_94.4 | PCR             | Yes |
| Torreya_grandis_2_28.82                  | PCR             | Yes |
| Torreya_nucifera_1_92.69                 | PCR             | Yes |

---

\*Showing the name of species following the rank of the variant and the relative variant abundance.
