# Supplementary material for: Extensive Pyrosequencing Reveals Frequent Intra-Genomic Variations of Internal Transcribed Spacer Regions of Nuclear Ribosomal DNA
Source: PubMed Central journal article supplement (PMC3431384; doi:10.1371/journal.pone.0043971), 2012-08-30
Supplement: pone.0043971.s014.pdf [file pone.0043971.s014.pdf]

**Table S4.** Samples and their voucher numbers.

| No. | Division    | Family        | Species                                            | Voucher Number |
|-----|-------------|---------------|----------------------------------------------------|----------------|
| 1   | Angiosperms | Acoraceae     | <i>Acorus calamus</i>                              | PS1418MT03     |
| 2   | Angiosperms | Acoraceae     | <i>Acorus calamus</i>                              | PS1418MT04     |
| 3   | Angiosperms | Acoraceae     | <i>Acorus gramineus</i>                            | PS1301MT04     |
| 4   | Angiosperms | Acoraceae     | <i>Acorus gramineus</i>                            | PS1301MT05     |
| 5   | Angiosperms | Amaranthaceae | <i>Celosia argentea</i>                            | PS1495MT02     |
| 6   | Angiosperms | Amaranthaceae | <i>Celosia cristata</i>                            | PS1491MT02     |
| 7   | Angiosperms | Anacardiaceae | <i>Rhus chinensis</i>                              | PS1014MT03     |
| 8   | Angiosperms | Apiaceae      | <i>Angelica dahurica</i>                           | PS1197MT03     |
| 9   | Angiosperms | Apiaceae      | <i>Angelica dahurica</i>                           | PS1197MT01     |
| 10  | Angiosperms | Apiaceae      | <i>Angelica decursiva</i>                          | PS1226MT04     |
| 11  | Angiosperms | Apiaceae      | <i>Angelica decursiva</i>                          | PS1226MT05     |
| 12  | Angiosperms | Apiaceae      | <i>Angelica sinensis</i>                           | PS1205MT01     |
| 13  | Angiosperms | Apiaceae      | <i>Cryptotaenia japonica</i>                       | PS1223MT01     |
| 14  | Angiosperms | Apiaceae      | <i>Daucus carota</i>                               | PS1225MT02     |
| 15  | Angiosperms | Apiaceae      | <i>Foeniculum vulgare</i>                          | PS1222MT03     |
| 16  | Angiosperms | Apiaceae      | <i>Ligusticum jeholense</i>                        | PS1213MT02     |
| 17  | Angiosperms | Apiaceae      | <i>Ligusticum sinense</i>                          | PS1208MT01     |
| 18  | Angiosperms | Apiaceae      | <i>Ligusticum sinense</i> cv.<br><i>Chuanxiong</i> | PS1203MT01     |
| 19  | Angiosperms | Apiaceae      | <i>Ligusticum sinense</i> cv.<br><i>Chuanxiong</i> | PS1203MT02     |
| 20  | Angiosperms | Aquifoliaceae | <i>Ilex asprella</i>                               | PS0325MT01     |
| 21  | Angiosperms | Aquifoliaceae | <i>Ilex cornuta</i>                                | PS0320MT01     |
| 22  | Angiosperms | Aquifoliaceae | <i>Ilex cornuta</i>                                | PS0320MT03     |
| 23  | Angiosperms | Aquifoliaceae | <i>Ilex cornuta</i>                                | PS0320MT05     |
| 24  | Angiosperms | Aquifoliaceae | <i>Ilex pubilimba</i>                              | PS0324MT01     |
| 25  | Angiosperms | Aquifoliaceae | <i>Ilex rotunda</i>                                | PS0321MT01     |
| 26  | Angiosperms | Araliaceae    | <i>Eleutherococcus giraldii</i>                    | PS1461MT01     |
| 27  | Angiosperms | Araliaceae    | <i>Eleutherococcus nodiflorus</i>                  | PS1473MT01     |
| 28  | Angiosperms | Araliaceae    | <i>Eleutherococcus senticosus</i>                  | PS1456MT03     |
| 29  | Angiosperms | Araliaceae    | <i>Panax ginseng</i>                               | PS1467MT01     |
| 30  | Angiosperms | Araliaceae    | <i>Panax japonicus</i>                             | PS1477MT01     |
| 31  | Angiosperms | Araliaceae    | <i>Panax japonicus</i>                             | PS1477MT02     |
| 32  | Angiosperms | Araliaceae    | <i>Panax japonicus</i>                             | PS1477MT03     |
| 33  | Angiosperms | Araliaceae    | <i>Panax japonicus</i>                             | PS1477MT04     |

|    |             |                |                                  |            |
|----|-------------|----------------|----------------------------------|------------|
| 34 | Angiosperms | Araliaceae     | <i>Panax notoginseng</i>         | PS1469MT02 |
| 35 | Angiosperms | Araliaceae     | <i>Panax notoginseng</i>         | PS1469MT03 |
| 36 | Angiosperms | Araliaceae     | <i>Panax quinquefolius</i>       | PS1472MT01 |
| 37 | Angiosperms | Asclepiadaceae | <i>Cynanchum atratum</i>         | PS0833MT01 |
| 38 | Angiosperms | Asclepiadaceae | <i>Cynanchum paniculatum</i>     | PS0836MT01 |
| 39 | Angiosperms | Asclepiadaceae | <i>Cynanchum stauntonii</i>      | PS0835MT04 |
| 40 | Angiosperms | Asclepiadaceae | <i>Periploca sepium</i>          | PS0840MT03 |
| 41 | Angiosperms | Asteraceae     | <i>Artemisia annua</i>           | PS0633MT04 |
| 42 | Angiosperms | Asteraceae     | <i>Artemisia annua</i>           | PS0633MT05 |
| 43 | Angiosperms | Asteraceae     | <i>Artemisia argyi</i>           | PS0590MT04 |
| 44 | Angiosperms | Asteraceae     | <i>Artemisia capillaris</i>      | PS0712MT02 |
| 45 | Angiosperms | Asteraceae     | <i>Artemisia gmelinii</i>        | PS0594MT01 |
| 46 | Angiosperms | Asteraceae     | <i>Artemisia lavandulaefolia</i> | PS0703MT01 |
| 47 | Angiosperms | Asteraceae     | <i>Aster ageratoides</i>         | PS0680MT01 |
| 48 | Angiosperms | Asteraceae     | <i>Aster tataricus</i>           | PS0721MT03 |
| 49 | Angiosperms | Asteraceae     | <i>Cirsium japonicum</i>         | PS0612MT02 |
| 50 | Angiosperms | Asteraceae     | <i>Cirsium japonicum</i>         | PS0612MT03 |
| 51 | Angiosperms | Asteraceae     | <i>Cirsium japonicum</i>         | PS0612MT06 |
| 52 | Angiosperms | Asteraceae     | <i>Cirsium setosum</i>           | PS0611MT01 |
| 53 | Angiosperms | Asteraceae     | <i>Cirsium setosum</i>           | PS0611MT02 |
| 54 | Angiosperms | Asteraceae     | <i>Cirsium setosum</i>           | PS0611MT04 |
| 55 | Angiosperms | Asteraceae     | <i>Eupatorium fortunei</i>       | PS0672MT01 |
| 56 | Angiosperms | Asteraceae     | <i>Inula britanica</i>           | PS0670MT01 |
| 57 | Angiosperms | Asteraceae     | <i>Inula britanica</i>           | PS0670MT02 |
| 58 | Angiosperms | Asteraceae     | <i>Inula cappa</i>               | PS0701MT01 |
| 59 | Angiosperms | Asteraceae     | <i>Inula helenium</i>            | PS0689MT01 |
| 60 | Angiosperms | Asteraceae     | <i>Prenanthes tatarinowii</i>    | PS0671MT01 |
| 61 | Angiosperms | Asteraceae     | <i>Siegesbeckia glabrescens</i>  | PS0660MT01 |
| 62 | Angiosperms | Asteraceae     | <i>Siegesbeckia orientalis</i>   | PS0618MT05 |
| 63 | Angiosperms | Asteraceae     | <i>Stemmacantha uniflora</i>     | PS0674MT01 |
| 64 | Angiosperms | Berberidaceae  | <i>Epimedium acuminatum</i>      | PS1499MT01 |
| 65 | Angiosperms | Berberidaceae  | <i>Epimedium acuminatum</i>      | PS1499MT02 |
| 66 | Angiosperms | Berberidaceae  | <i>Epimedium pubescens</i>       | PS1505MT01 |
| 67 | Angiosperms | Berberidaceae  | <i>Epimedium sagittatum</i>      | PS1502MT02 |
| 68 | Angiosperms | Berberidaceae  | <i>Epimedium sagittatum</i>      | PS1502MT03 |
| 69 | Angiosperms | Brassicaceae   | <i>Arabidopsis thaliana</i>      | PS9001MT01 |
| 70 | Angiosperms | Brassicaceae   | <i>Arabidopsis thaliana</i>      | PS9001MT02 |
| 71 | Angiosperms | Brassicaceae   | <i>Arabidopsis thaliana</i>      | PS9001MT03 |
| 72 | Angiosperms | Caprifoliaceae | <i>Lonicera confusa</i>          | PS1161MT03 |

|     |             |                 |                                            |            |
|-----|-------------|-----------------|--------------------------------------------|------------|
| 73  | Angiosperms | Caprifoliaceae  | <i>Lonicera japonica</i>                   | PS1165MT02 |
| 74  | Angiosperms | Caryophyllaceae | <i>Stellaria vestita</i>                   | PS1317MT01 |
| 75  | Angiosperms | Convolvulaceae  | <i>Ipomoea nil</i>                         | PS1536MT01 |
| 76  | Angiosperms | Convolvulaceae  | <i>Ipomoea nil</i>                         | PS1536MT05 |
| 77  | Angiosperms | Convolvulaceae  | <i>Ipomoea purpurea</i>                    | PS1542MT05 |
| 78  | Angiosperms | Crassulaceae    | <i>Sedum emarginatum</i>                   | PS0574MT03 |
| 79  | Angiosperms | Crassulaceae    | <i>Sedum lineare</i>                       | PS0577MT01 |
| 80  | Angiosperms | Crassulaceae    | <i>Sedum sarmentosum</i>                   | PS0575MT01 |
| 81  | Angiosperms | Crassulaceae    | <i>Sedum sarmentosum</i>                   | PS0575MT02 |
| 82  | Angiosperms | Cucurbitaceae   | <i>Siraitia grosvenorii</i>                | PS0464MT02 |
| 83  | Angiosperms | Euphorbiaceae   | <i>Euphorbia esula</i>                     | PS0193MT01 |
| 84  | Angiosperms | Euphorbiaceae   | <i>Euphorbia hirta</i>                     | PS0175MT02 |
| 85  | Angiosperms | Euphorbiaceae   | <i>Euphorbia hirta</i>                     | PS0175MT03 |
| 86  | Angiosperms | Euphorbiaceae   | <i>Euphorbia pekinensis</i>                | PS0187MT01 |
| 87  | Angiosperms | Fabaceae        | <i>Astragalus chinensis</i>                | PS0272MT01 |
| 88  | Angiosperms | Fabaceae        | <i>Astragalus hancockii</i>                | PS0271MT01 |
| 89  | Angiosperms | Fabaceae        | <i>Astragalus mongholicus</i>              | PS0277MT01 |
| 90  | Angiosperms | Fabaceae        | <i>Flemingia lineata</i>                   | PS0223MT01 |
| 91  | Angiosperms | Fabaceae        | <i>Flemingia macrophylla</i>               | PS0222MT02 |
| 92  | Angiosperms | Fabaceae        | <i>Flemingia macrophylla</i>               | PS0222MT03 |
| 93  | Angiosperms | Fabaceae        | <i>Pueraria montana</i> var. <i>lobata</i> | PS0313MT04 |
| 94  | Angiosperms | Fabaceae        | <i>Pueraria peduncularis</i>               | PS0314MT01 |
| 95  | Angiosperms | Fabaceae        | <i>Senna alata</i>                         | PS1362MT02 |
| 96  | Angiosperms | Fabaceae        | <i>Senna obtusifolia</i>                   | PS1588MT08 |
| 97  | Angiosperms | Fabaceae        | <i>Sophora flavescens</i>                  | PS0247MT04 |
| 98  | Angiosperms | Fabaceae        | <i>Sophora japonica</i>                    | PS0241MT03 |
| 99  | Angiosperms | Fabaceae        | <i>Sophora tonkinensis</i>                 | PS0228MT01 |
| 100 | Angiosperms | Gentianaceae    | <i>Gentiana macrophylla</i>                | PS0821MT02 |
| 101 | Angiosperms | Gentianaceae    | <i>Gentiana manshurica</i>                 | PS0823MT01 |
| 102 | Angiosperms | Gentianaceae    | <i>Gentiana rigescens</i>                  | PS0822MT01 |
| 103 | Angiosperms | Gentianaceae    | <i>Gentiana straminea</i>                  | PS0820MT01 |
| 104 | Angiosperms | Gentianaceae    | <i>Gentiana straminea</i>                  | PS0820MT02 |
| 105 | Angiosperms | Liliaceae       | <i>Allium tuberosum</i>                    | PS0038MT01 |
| 106 | Angiosperms | Liliaceae       | <i>Allium tuberosum</i>                    | PS0038MT02 |
| 107 | Angiosperms | Liliaceae       | <i>Allium tuberosum</i>                    | PS0038MT03 |
| 108 | Angiosperms | Liliaceae       | <i>Allium tuberosum</i>                    | PS0038MT05 |
| 109 | Angiosperms | Liliaceae       | <i>Aloe vera</i>                           | PS0044MT01 |
| 110 | Angiosperms | Liliaceae       | <i>Aloe vera</i>                           | PS0044MT02 |
| 111 | Angiosperms | Liliaceae       | <i>Aloe vera</i>                           | PS0044MT03 |

|     |             |             |                                             |            |
|-----|-------------|-------------|---------------------------------------------|------------|
| 112 | Angiosperms | Liliaceae   | <i>Asparagus cochinchinensis</i>            | PS0057MT01 |
| 113 | Angiosperms | Liliaceae   | <i>Asparagus cochinchinensis</i>            | PS0057MT04 |
| 114 | Angiosperms | Liliaceae   | <i>Asparagus cochinchinensis</i>            | PS0057MT05 |
| 115 | Angiosperms | Liliaceae   | <i>Asparagus cochinchinensis</i>            | PS0057MT06 |
| 116 | Angiosperms | Liliaceae   | <i>Asparagus schoberioides</i>              | PS0058MT01 |
| 117 | Angiosperms | Liliaceae   | <i>Asparagus trichophyllus</i>              | PS0059MT01 |
| 118 | Angiosperms | Liliaceae   | <i>Asparagus trichophyllus</i>              | PS0059MT02 |
| 119 | Angiosperms | Liliaceae   | <i>Lilium pumilum</i>                       | PS0064MT01 |
| 120 | Angiosperms | Liliaceae   | <i>Lilium tigrinum</i>                      | PS0039MT01 |
| 121 | Angiosperms | Liliaceae   | <i>Liriope spicata</i>                      | PS0055MT01 |
| 122 | Angiosperms | Myrsinaceae | <i>Ardisia crenata</i>                      | PS1658MT02 |
| 123 | Angiosperms | Myrsinaceae | <i>Ardisia crenata</i>                      | PS1658MT03 |
| 124 | Angiosperms | Myrsinaceae | <i>Ardisia japonica</i>                     | PS1659MT05 |
| 125 | Angiosperms | Orchidaceae | <i>Dendrobium capillipes</i>                | PS2502MT01 |
| 126 | Angiosperms | Orchidaceae | <i>Dendrobium catenatum</i>                 | PS2521MT01 |
| 127 | Angiosperms | Orchidaceae | <i>Dendrobium chrysanthum</i>               | PS2515MT01 |
| 128 | Angiosperms | Orchidaceae | <i>Dendrobium chrysotoxum</i>               | PS2501MT01 |
| 129 | Angiosperms | Orchidaceae | <i>Dendrobium chrysotoxum</i>               | PS2501MT03 |
| 130 | Angiosperms | Orchidaceae | <i>Dendrobium crepidatum</i>                | PS2517MT01 |
| 131 | Angiosperms | Orchidaceae | <i>Dendrobium crystallinum</i>              | PS2519MT01 |
| 132 | Angiosperms | Orchidaceae | <i>Dendrobium cucullatum</i>                | PS2523MT01 |
| 133 | Angiosperms | Orchidaceae | <i>Dendrobium denneanum</i>                 | PS0758MT01 |
| 134 | Angiosperms | Orchidaceae | <i>Dendrobium devonianum</i>                | PS2520MT01 |
| 135 | Angiosperms | Orchidaceae | <i>Dendrobium gratiosissimum</i>            | PS2513MT01 |
| 136 | Angiosperms | Orchidaceae | <i>Dendrobium loddigesii</i>                | PS1748MT02 |
| 137 | Angiosperms | Orchidaceae | <i>Dendrobium nobile</i>                    | PS0766MT04 |
| 138 | Angiosperms | Orchidaceae | <i>Dendrobium nobile</i>                    | PS0766MT06 |
| 139 | Angiosperms | Orchidaceae | <i>Dendrobium pendulum</i>                  | PS2511MT01 |
| 140 | Angiosperms | Orchidaceae | <i>Dendrobium polyanthum</i>                | PS2518MT01 |
| 141 | Angiosperms | Orchidaceae | <i>Dendrobium polyanthum</i>                | PS2518MT02 |
| 142 | Angiosperms | Orchidaceae | <i>Dendrobium spatella</i>                  | PS2527MT01 |
| 143 | Angiosperms | Orchidaceae | <i>Dendrobium trigonopus</i>                | PS2506MT01 |
| 144 | Angiosperms | Orchidaceae | <i>Dendrobium wardianum</i>                 | PS2509MT01 |
| 145 | Angiosperms | Orchidaceae | <i>Dendrobium wardianum</i>                 | PS2509MT02 |
| 146 | Angiosperms | Orchidaceae | <i>Dendrobium williamsonii</i>              | PS2503MT01 |
| 147 | Angiosperms | Paeoniaceae | <i>Paeonia anomala</i> ssp. <i>veitchii</i> | PS0906MT01 |
| 148 | Angiosperms | Paeoniaceae | <i>Paeonia anomala</i> ssp. <i>veitchii</i> | PS0906MT02 |
| 149 | Angiosperms | Paeoniaceae | <i>Paeonia lactiflora</i>                   | PS0905MT01 |
| 150 | Angiosperms | Paeoniaceae | <i>Paeonia ostii</i>                        | PS0913MT02 |

|     |             |               |                                          |            |
|-----|-------------|---------------|------------------------------------------|------------|
| 151 | Angiosperms | Piperaceae    | <i>Piper longum</i>                      | PS0445MT01 |
| 152 | Angiosperms | Piperaceae    | <i>Piper longum</i>                      | PS0445MT02 |
| 153 | Angiosperms | Piperaceae    | <i>Piper nigrum</i>                      | PS0449MT02 |
| 154 | Angiosperms | Poaceae       | <i>Oryza sativa</i> ssp. <i>indica</i>   | PS9003MT01 |
| 155 | Angiosperms | Poaceae       | <i>Oryza sativa</i> ssp. <i>indica</i>   | PS9003MT02 |
| 156 | Angiosperms | Poaceae       | <i>Oryza sativa</i> ssp. <i>indica</i>   | PS9003MT03 |
| 157 | Angiosperms | Poaceae       | <i>Oryza sativa</i> ssp. <i>japonica</i> | PS9002MT01 |
| 158 | Angiosperms | Poaceae       | <i>Oryza sativa</i> ssp. <i>japonica</i> | PS9002MT02 |
| 159 | Angiosperms | Poaceae       | <i>Zea mays</i>                          | PS9005MT01 |
| 160 | Angiosperms | Poaceae       | <i>Zea mays</i>                          | PS9005MT02 |
| 161 | Angiosperms | Poaceae       | <i>Zea mays</i>                          | PS9005MT03 |
| 162 | Angiosperms | Polygonaceae  | <i>Polygonum chinense</i>                | PS0794MT01 |
| 163 | Angiosperms | Polygonaceae  | <i>Polygonum chinense</i>                | PS0794MT02 |
| 164 | Angiosperms | Ranunculaceae | <i>Cimicifuga dahurica</i>               | PS0929MT02 |
| 165 | Angiosperms | Ranunculaceae | <i>Cimicifuga foetida</i>                | PS0925MT01 |
| 166 | Angiosperms | Ranunculaceae | <i>Cimicifuga foetida</i>                | PS0925MT02 |
| 167 | Angiosperms | Rosaceae      | <i>Amygdalus persica</i>                 | PS1117MT02 |
| 168 | Angiosperms | Rosaceae      | <i>Amygdalus triloba</i>                 | PS1127MT02 |
| 169 | Angiosperms | Rosaceae      | <i>Armeniaca sibirica</i>                | PS1121MT04 |
| 170 | Angiosperms | Rosaceae      | <i>Armeniaca vulgaris</i>                | PS1123MT01 |
| 171 | Angiosperms | Rosaceae      | <i>Armeniaca vulgaris</i>                | PS1123MT02 |
| 172 | Angiosperms | Rosaceae      | <i>Cerasus glandulosa</i>                | PS1088MT01 |
| 173 | Angiosperms | Rosaceae      | <i>Cerasus japonica</i>                  | PS1128MT01 |
| 174 | Angiosperms | Rosaceae      | <i>Cerasus tomentosa</i>                 | PS1092MT01 |
| 175 | Angiosperms | Rosaceae      | <i>Potentilla chinensis</i>              | PS1120MT01 |
| 176 | Angiosperms | Rosaceae      | <i>Potentilla chinensis</i>              | PS1120MT02 |
| 177 | Angiosperms | Rosaceae      | <i>Potentilla fruticosa</i>              | PS1084MT01 |
| 178 | Angiosperms | Rosaceae      | <i>Potentilla nivea</i>                  | PS1124MT01 |
| 179 | Angiosperms | Rosaceae      | <i>Potentilla supina</i>                 | PS1067MT01 |
| 180 | Angiosperms | Rosaceae      | <i>Potentilla supina</i>                 | PS1067MT02 |
| 181 | Angiosperms | Rosaceae      | <i>Rosa bella</i>                        | PS1098MT01 |
| 182 | Angiosperms | Rosaceae      | <i>Rosa laevigata</i>                    | PS1085MT01 |
| 183 | Angiosperms | Rosaceae      | <i>Rubus chingii</i>                     | PS1135MT01 |
| 184 | Angiosperms | Rosaceae      | <i>Rubus parvifolius</i>                 | PS1093MT01 |
| 185 | Angiosperms | Rubiaceae     | <i>Uncaria macrophylla</i>               | PS1038MT01 |
| 186 | Angiosperms | Rubiaceae     | <i>Uncaria macrophylla</i>               | PS1038MT03 |
| 187 | Angiosperms | Rubiaceae     | <i>Uncaria macrophylla</i>               | PS1038MT04 |
| 188 | Angiosperms | Rubiaceae     | <i>Uncaria sessilifructus</i>            | PS1041MT02 |
| 189 | Angiosperms | Rubiaceae     | <i>Uncaria sinensis</i>                  | PS1039MT01 |

|     |             |                  |                                    |            |
|-----|-------------|------------------|------------------------------------|------------|
| 190 | Angiosperms | Rutaceae         | <i>Citrus aurantium</i>            | PS1613MT01 |
| 191 | Angiosperms | Rutaceae         | <i>Citrus limonum</i>              | PS1609MT01 |
| 192 | Angiosperms | Rutaceae         | <i>Citrus maxima</i>               | PS1600MT04 |
| 193 | Angiosperms | Rutaceae         | <i>Citrus maxima</i>               | PS1600MT05 |
| 194 | Angiosperms | Rutaceae         | <i>Citrus maxima</i>               | PS1600MT06 |
| 195 | Angiosperms | Rutaceae         | <i>Citrus maxima</i>               | PS1600MT08 |
| 196 | Angiosperms | Rutaceae         | <i>Citrus maxima</i>               | PS1600MT09 |
| 197 | Angiosperms | Rutaceae         | <i>Citrus medica</i>               | PS1616MT02 |
| 198 | Angiosperms | Rutaceae         | <i>Citrus reticulata</i>           | PS1596MT01 |
| 199 | Angiosperms | Rutaceae         | <i>Melicope pteleifolia</i>        | PS1610MT01 |
| 200 | Angiosperms | Rutaceae         | <i>Tetradium ruticarpum</i>        | PS1614MT01 |
| 201 | Angiosperms | Rutaceae         | <i>Zanthoxylum bungeanum</i>       | PS1599MT01 |
| 202 | Angiosperms | Salicaceae       | <i>Populus trichocarpa</i>         | PS9004MT01 |
| 203 | Angiosperms | Santalaceae      | <i>Santalum album</i>              | PS1377MT03 |
| 204 | Angiosperms | Saxifragaceae    | <i>Dichroa febrifuga</i>           | PS0850MT01 |
| 205 | Angiosperms | Scrophulariaceae | <i>Veronicastrum axillare</i>      | PS1525MT01 |
| 206 | Angiosperms | Scrophulariaceae | <i>Veronicastrum stenostachyum</i> | PS1519MT01 |
| 207 | Angiosperms | Simaroubaceae    | <i>Brucea javanica</i>             | PS0753MT01 |
| 208 | Angiosperms | Simaroubaceae    | <i>Brucea javanica</i>             | PS0753MT02 |
| 209 | Angiosperms | Simaroubaceae    | <i>Brucea javanica</i>             | PS0753MT05 |
| 210 | Angiosperms | Simaroubaceae    | <i>Brucea mollis</i>               | PS0752MT01 |
| 211 | Angiosperms | Solanaceae       | <i>Datura arborea</i>              | PS1147MT01 |
| 212 | Angiosperms | Solanaceae       | <i>Datura metel</i>                | PS1152MT02 |
| 213 | Angiosperms | Solanaceae       | <i>Solanum lyratum</i>             | PS1137MT01 |
| 214 | Angiosperms | Solanaceae       | <i>Solanum nigrum</i>              | PS1144MT02 |
| 215 | Angiosperms | Urticaceae       | <i>Boehmeria nivea</i>             | PS1031MT01 |
| 216 | Angiosperms | Urticaceae       | <i>Boehmeria nivea</i>             | PS1031MT05 |
| 217 | Angiosperms | Verbenaceae      | <i>Clerodendrum bungei</i>         | PS0853MT01 |
| 218 | Angiosperms | Verbenaceae      | <i>Clerodendrum cytophyllum</i>    | PS0856MT02 |
| 219 | Angiosperms | Verbenaceae      | <i>Clerodendrum japonicum</i>      | PS0851MT01 |
| 220 | Angiosperms | Verbenaceae      | <i>Verbena officinalis</i>         | PS0865MT03 |
| 221 | Angiosperms | Violaceae        | <i>Viola diffusa</i>               | PS0555MT01 |
| 222 | Angiosperms | Violaceae        | <i>Viola philippica</i>            | PS0561MT02 |
| 223 | Angiosperms | Zingiberaceae    | <i>Alpinia galanga</i>             | PS0515MT02 |
| 224 | Angiosperms | Zingiberaceae    | <i>Alpinia galanga</i>             | PS0515MT03 |
| 225 | Angiosperms | Zingiberaceae    | <i>Alpinia galanga</i>             | PS0515MT05 |
| 226 | Angiosperms | Zingiberaceae    | <i>Alpinia hainanensis</i>         | PS0511MT01 |
| 227 | Angiosperms | Zingiberaceae    | <i>Alpinia zerumbet</i>            | PS0532MT01 |
| 228 | Ferns       | Lygodiaceae      | <i>Lygodium japonicum</i>          | PS0395MT01 |

|     |             |                 |                                                    |            |
|-----|-------------|-----------------|----------------------------------------------------|------------|
| 229 | Ferns       | Lygodiaceae     | <i>Lygodium japonicum</i>                          | PS0395MT02 |
| 230 | Ferns       | Lygodiaceae     | <i>Lygodium japonicum</i>                          | PS0395MT03 |
| 231 | Ferns       | Lygodiaceae     | <i>Lygodium japonicum</i>                          | PS0395MT04 |
| 232 | Ferns       | Lygodiaceae     | <i>Lygodium japonicum</i>                          | PS0395MT05 |
| 233 | Ferns       | Selaginellaceae | <i>Selaginella doederleinii</i>                    | PS0729MT01 |
| 234 | Ferns       | Selaginellaceae | <i>Selaginella moellendorffii</i>                  | PS0727MT01 |
| 235 | Ferns       | Selaginellaceae | <i>Selaginella uncinata</i>                        | PS0726MT01 |
| 236 | Gymnosperms | Ephedraceae     | <i>Ephedra equisetina</i>                          | PS0848MT01 |
| 237 | Gymnosperms | Ephedraceae     | <i>Ephedra equisetina</i>                          | PS0848MT02 |
| 238 | Gymnosperms | Ephedraceae     | <i>Ephedra sinica</i>                              | PS0847MT01 |
| 239 | Gymnosperms | Pinaceae        | <i>Pinus bungeana</i>                              | PS1348MT01 |
| 240 | Gymnosperms | Pinaceae        | <i>Pinus ponderosa</i>                             | PS1359MT01 |
| 241 | Gymnosperms | Pinaceae        | <i>Pinus strobus</i>                               | PS1350MT01 |
| 242 | Gymnosperms | Pinaceae        | <i>Pinus wallichiana</i>                           | PS1357MT01 |
| 243 | Gymnosperms | Taxaceae        | <i>Torreya californica</i>                         | PS1186MT01 |
| 244 | Gymnosperms | Taxaceae        | <i>Torreya fargesii</i> var.<br><i>yunnanensis</i> | PS1190MT01 |
| 245 | Gymnosperms | Taxaceae        | <i>Torreya grandis</i>                             | PS1744MT01 |
| 246 | Gymnosperms | Taxaceae        | <i>Torreya grandis</i>                             | PS1744MT02 |
| 247 | Gymnosperms | Taxaceae        | <i>Torreya nucifera</i>                            | PS1187MT01 |

---
