# Supplementary material for: Extensive Pyrosequencing Reveals Frequent Intra-Genomic Variations of Internal Transcribed Spacer Regions of Nuclear Ribosomal DNA
Source: PubMed Central journal article supplement (PMC3431384; doi:10.1371/journal.pone.0043971), 2012-08-30
Supplement: pone.0043971.s015.pdf [file pone.0043971.s015.pdf]

**Table S5.** Sequence-tagged PCR primer pairs for each sample.

| No. | Species                 | Forward Primer (5'-3')              | Reverse Primer (5'-3')               | Type of Primer * | Voucher Number |
|-----|-------------------------|-------------------------------------|--------------------------------------|------------------|----------------|
| 1   | <i>Acorus calamus</i>   | TAGGCAAGCTGAGTCTTTGAAC<br>GCAAGTTG  | TAGGCAAGCTTCCTCCGCTTAT<br>TGATATG    | A                | PS1418MT03     |
| 2   | <i>Acorus calamus</i>   | TAGGCTTCAGGAGTCTTTGAAC<br>GCAAGTTG  | TAGGCTTCAGTCCCTCCGCTTAT<br>TGATATG   | A                | PS1418MT04     |
| 3   | <i>Acorus gramineus</i> | TACCGAAGTCGAGTCTTTGAAC<br>GCAAGTTG  | TACCGAAGTCTCCTCCGCTTAT<br>TGATATG    | A                | PS1301MT04     |
| 4   | <i>Acorus gramineus</i> | TACGAGTATGGAGTCTTTGAAC<br>GCAAGTTG  | TACGAGTATGTCCCTCCGCTTATT<br>GATATG   | A                | PS1301MT05     |
| 5   | <i>Allium tuberosum</i> | CGTACACAGAATCCCGTGAATC<br>ATCG      | CGTACAGCCCCGTATGATCTGA<br>GGTC       | C                | PS0038MT01     |
| 6   | <i>Allium tuberosum</i> | CTAGCACAGAATCCCGTGAATC<br>ATCG      | CTAGCAGCCCCGTATGATCTGA<br>GGTC       | C                | PS0038MT02     |
| 7   | <i>Allium tuberosum</i> | TCAGGACAGAATCCCGTGAATC<br>ATCG      | TCAGGAGCCCCGTATGATCTGA<br>GGTC       | C                | PS0038MT03     |
| 8   | <i>Allium tuberosum</i> | TGCACACAGAATCCCGTGAATC<br>ATCG      | TGCACAGCCCCGTATGATCTGA<br>GGTC       | C                | PS0038MT05     |
| 9   | <i>Aloe vera</i>        | ACGGTCCATGCGAGTTTTTGA<br>CGCAAGTTG  | ACGGTCCATGGTTTCTTTTCCT<br>CCGCTTATTG | B                | PS0044MT01     |
| 10  | <i>Aloe vera</i>        | AGACTCAGCGCGAGTTTTTGA<br>ACGCAAGTTG | AGACTCAGCGTTTCTTTTCCT<br>CCGCTTATTG  | B                | PS0044MT02     |
| 11  | <i>Aloe vera</i>        | AGAGCGTCACCGAGTTTTTGA<br>ACGCAAGTTG | AGAGCGTCACGTTTCTTTTCCT<br>CCGCTTATTG | B                | PS0044MT03     |
| 12  | <i>Alpinia galanga</i>  | AGTCCTGAATCATTGAGTCTTT<br>GAACGC    | AGTCCTTCCTCCTCCGCTTATTT<br>ATATG     | C                | PS0515MT02     |

|    |                             |                                     |                                     |   |            |
|----|-----------------------------|-------------------------------------|-------------------------------------|---|------------|
| 13 | <i>Alpinia galanga</i>      | ATCGGTGAATCATTGAGTCTTT<br>GAACGC    | ATCGGTTCCCTCCGCTTATTT<br>ATATG      | C | PS0515MT03 |
| 14 | <i>Alpinia galanga</i>      | TCAGGCGAATCATTGAGTCTTT<br>GAACGC    | TCAGGCTCCTCCGCTTATTT<br>ATATG       | C | PS0515MT05 |
| 15 | <i>Alpinia hainanensis</i>  | AGTCAGCGTGAACCATTGAGT<br>CTTTG      | AGTCAGGTTTCTCCTCCCGC<br>TTAT        | C | PS0511MT01 |
| 16 | <i>Alpinia zerumbet</i>     | CGTGAACCATTGAGTCTTTGA               | GTTTCTCCTCCGCTTAT                   | C | PS0532MT01 |
| 17 | <i>Amygdalus persica</i>    | TGACCATTTCGGAGTCTTTGAAC<br>GCAAGTTG | TGACCATTTCGCTCCGCTTATT<br>GATATG    | A | PS1117MT02 |
| 18 | <i>Amygdalus triloba</i>    | TGACCTGGACGAGTCTTTGAA<br>CGCAAGTTG  | TGACCTGGACTCCTCCGCTTAT<br>TGATATG   | A | PS1127MT02 |
| 19 | <i>Angelica dahurica</i>    | CTATAGCGTAGAGTCTTTGAAC<br>GCAAGTTG  | CTATAGCGTATCCTCCGCTTATT<br>GATATG   | A | PS1197MT01 |
| 20 | <i>Angelica dahurica</i>    | CTATGTACAGGAGTCTTTGAAC<br>GCAAGTTG  | CTATGTACAGTCTCCGCTTATT<br>GATATG    | A | PS1197MT03 |
| 21 | <i>Angelica decursiva</i>   | TACACACACTGAGTCTTTGAAC<br>GCAAGTTG  | TACACACACTCCTCCGCTTAT<br>TGATATG    | A | PS1226MT04 |
| 22 | <i>Angelica decursiva</i>   | TACAGATCGTGAGTCTTTGAAC<br>GCAAGTTG  | TACAGATCGTTCCTCCGCTTATT<br>GATATG   | A | PS1226MT05 |
| 23 | <i>Angelica sinensis</i>    | CTCGATATAGGAGTCTTTGAAC<br>GCAAGTTG  | CTCGATATAGTCTCCGCTTATT<br>GATATG    | A | PS1205MT01 |
| 24 | <i>Arabidopsis thaliana</i> | ACGAGTGCGTGCAGAATCCCG<br>TGAACCA    | ACGAGTGCGTTCTTTTCCTCCG<br>CTTATTGAT | C | PS9001MT01 |
| 25 | <i>Arabidopsis thaliana</i> | TGCTCGCTACGCAGAATCCCGT<br>GAACCA    | TGCTCGCTACTCTTTTCCTCCG<br>CTTATTGAT | C | PS9001MT02 |
| 26 | <i>Arabidopsis thaliana</i> | TCGCAGACACGCAGAATCCCG<br>TGAACCA    | TCGCAGACACTCTTTTCCTCCG<br>CTTATTGAT | C | PS9001MT03 |
| 27 | <i>Ardisia crenata</i>      | ATAGATAGACCGAGTTTTTGAA              | ATAGATAGACGTTTCTTTTCCTC             | B | PS1658MT02 |

|    |                                      |                                     |                                      |   |            |
|----|--------------------------------------|-------------------------------------|--------------------------------------|---|------------|
| 28 | <i>Ardisia crenata</i>               | CGCAAGTTG<br>CTCTACGCTCCGAGTTTTTGAA | CGCTTATTG<br>CTCTACGCTCGTTTCTTTTCCTC | B | PS1658MT03 |
| 29 | <i>Ardisia japonica</i>              | CGCAAGTTG<br>TGTCGTCGCACGAGTTTTTGAA | CGCTTATTG<br>TGTCGTCGCAGTTTCTTTTCCT  | C | PS1659MT05 |
| 30 | <i>Armeniaca sibirica</i>            | CGCAAGTT<br>CGATTGGAATCCCGTGAACCAT  | CCGCTTATT<br>CGATTGAGTTTCTTTTCCTCCG  | C | PS1121MT04 |
| 31 | <i>Armeniaca vulgaris</i>            | CG<br>TCTGATCGAGGAGTCTTTGAAC        | CTTA<br>TCTGATCGAGTCCTCCGCTTATT      | A | PS1123MT01 |
| 32 | <i>Armeniaca vulgaris</i>            | GCAAGTTG<br>TGAACGGCATGAGTCTTTGAAC  | GATATG<br>TGAACGGCATTCTCCGCTTAT      | A | PS1123MT02 |
| 33 | <i>Artemisia annua</i>               | GCAAGTTG<br>ATAGCTCTCGCGAGTTTTTGAA  | TGATATG<br>ATAGCTCTCGGTTTCTTTTCCTC   | B | PS0633MT04 |
| 34 | <i>Artemisia annua</i>               | CGCAAGTTG<br>CGCGTGCTAGCGAGTTTTTGAA | CGCTTATTG<br>CGCGTGCTAGGTTTCTTTTCCT  | B | PS0633MT05 |
| 35 | <i>Artemisia argyi</i>               | CGCAAGTTG<br>ATCGAATCCCGTGAACCATCG  | CGCTTATTG<br>GCACCTTGTAAGTTTCTTTTCC  | C | PS0590MT04 |
| 36 | <i>Artemisia capillaris</i>          | TTCAGAAATCCCGTGAACCAT               | TCC<br>GCCTTTTCCTCCGCTTATTGA         | C | PS0712MT02 |
| 37 | <i>Artemisia gmelinii</i>            | ACGCAGAATCCCGTGAACCAT               | TCC<br>GCGTTTCTTTTCCTCCGCTTA         | C | PS0594MT01 |
| 38 | <i>Artemisia<br/>lavandulaefolia</i> | TTGAATCCCGTGAACCATCG                | TCC<br>CGACCTTGTAAGTTTCTTTTCC        | C | PS0703MT01 |
| 39 | <i>Asparagus<br/>cochinchinensis</i> | ACGTTTCATTCCCGTGAACCCAT<br>CG       | TCC<br>ACGTTCTTCTTCTCCTCCGCTTA       | C | PS0057MT01 |
| 40 | <i>Asparagus<br/>cochinchinensis</i> | ACGTTGATTCCCGTGAACCCAT<br>CG        | TTGA<br>ACGTTGTTCTTCTCCTCCGCTTA      | C | PS0057MT04 |
| 41 | <i>Asparagus<br/>cochinchinensis</i> | ACTGACATTCCCGTGAACCCAT<br>CG        | TTGA<br>ACTGACTTCTTCTCCTCCGCTTA      | C | PS0057MT05 |
| 42 | <i>Asparagus</i>                     | AGCTAGATTCCCGTGAACCCAT              | TTGA<br>AGCTAGTTCTTCTCCTCCGCTTA      | C | PS0057MT06 |

|    |                                |                                     |                                      |   |            |
|----|--------------------------------|-------------------------------------|--------------------------------------|---|------------|
|    | <i>cochinchinensis</i>         | CG                                  | TTGA                                 |   |            |
| 43 | <i>Asparagus schoberioides</i> | CGTATGCGACGAGTCTTTGAAC<br>GCAAGTTG  | CGTATGCGACTCCTCCGCTTATT<br>GATATG    | A | PS0058MT01 |
| 44 | <i>Asparagus trichophyllus</i> | CGTTATTACGGAGTCTTTGAAC<br>GCAAGTTG  | CGTTATTACGTCCTCCGCTTATT<br>GATATG    | A | PS0059MT01 |
| 45 | <i>Asparagus trichophyllus</i> | CTACGACTGCGAGTCTTTGAAC<br>GCAAGTTG  | CTACGACTGCTCCTCCGCTTAT<br>TGATATG    | A | PS0059MT02 |
| 46 | <i>Aster ageratoides</i>       | TACAGAATCCCGTGAACCATC               | GCTTGTAAGTTTCTTTTCCTCC<br>G          | C | PS0680MT01 |
| 47 | <i>Aster tataricus</i>         | ATACGACGTACGAGTTTTTGAA<br>CGCAAGTTG | ATACGACGTAGTTTCTTTTCCTC<br>CGCTTATTG | B | PS0721MT03 |
| 48 | <i>Astragalus chinensis</i>    | CGAGAGATACGAGTCTTTGAAC<br>GCAAGTTG  | CGAGAGATACTCCTCCGCTTAT<br>TGATATG    | A | PS0272MT01 |
| 49 | <i>Astragalus hancockii</i>    | CACACGATAGGAGTCTTTGAAC<br>GCAAGTTG  | CACACGATAGTCCTCCGCTTAT<br>TGATATG    | A | PS0271MT01 |
| 50 | <i>Astragalus mongholicus</i>  | TGCTAGTCAGGAGTCTTTGAAC<br>GCAAGTTG  | TGCTAGTCAGTCCTCCGCTTAT<br>TGATATG    | A | PS0277MT01 |
| 51 | <i>Boehmeria nivea</i>         | AGCGACTAGCGAGTCTTTGAA<br>CGCAAGTTG  | AGCGACTAGTCCTCCGCTTAT<br>TGATATG     | A | PS1031MT01 |
| 52 | <i>Boehmeria nivea</i>         | ATCCGCCTAGGAGTCTTTGAAC<br>GCAAGTTG  | ATCCGCCTAGTCCTCCGCTTATT<br>GATATG    | A | PS1031MT05 |
| 53 | <i>Brucea javanica</i>         | AGCTCACGTAGAGTCTTTGAAC<br>GCAAGTTG  | AGCTCACGTATCCTCCGCTTATT<br>GATATG    | A | PS0753MT01 |
| 54 | <i>Brucea javanica</i>         | AGTCGAGAGAGAGTCTTTGAA<br>CGCAAGTTG  | AGTCGAGAGATCCTCCGCTTAT<br>TGATATG    | A | PS0753MT02 |
| 55 | <i>Brucea javanica</i>         | AGTGCTACGAGAGTCTTTGAAC<br>GCAAGTTG  | AGTGCTACGATCCTCCGCTTAT<br>TGATATG    | A | PS0753MT05 |
| 56 | <i>Brucea mollis</i>           | CAGCAGAATCCCGTGAACCAT               | GGTTCTTTTCCTCCGCTTATTG               | C | PS0752MT01 |

|    |                            |                                     |                                      |   |            |
|----|----------------------------|-------------------------------------|--------------------------------------|---|------------|
| 57 | <i>Celosia argentea</i>    | TATGCTAGTACGAGTTTTTGAA<br>CGCAAGTTG | TATGCTAGTAGTTTCTTTTCCTC<br>CGCTTATTG | B | PS1495MT02 |
| 58 | <i>Celosia cristata</i>    | ACAGTATATACGAGTTTTTGAA<br>CGCAAGTTG | ACAGTATATAGTTTCTTTTCCTC<br>CGCTTATTG | B | PS1491MT02 |
| 59 | <i>Cerasus glandulosa</i>  | TCGAATCCGAGAGTCTTTGAAC<br>GCAAGTTG  | TCGAATCCGATCCTCCGCTTATT<br>GATATG    | A | PS1088MT01 |
| 60 | <i>Cerasus japonica</i>    | CGTAACCAGAATCCCGTGAACC<br>ATC       | CGTAACTCTTTTCTCCGCTTAT<br>TGA        | C | PS1128MT01 |
| 61 | <i>Cerasus tomentosa</i>   | TCTATACTATGAGTCTTTGAACG<br>CAAGTTG  | TCTATACTATTCCTCCGCTTATT<br>GATATG    | A | PS1092MT01 |
| 62 | <i>Cimicifuga dahurica</i> | AGCCTGGCTAGAGTCTTTGAAC<br>GCAAGTTG  | AGCCTGGCTATCCTCCGCTTATT<br>GATATG    | A | PS0929MT02 |
| 63 | <i>Cimicifuga foetida</i>  | CGACACTATCGAGTCTTTGAAC<br>GCAAGTTG  | CGACACTATCTCCTCCGCTTATT<br>GATATG    | A | PS0925MT01 |
| 64 | <i>Cimicifuga foetida</i>  | CTAGTCACTCGAGTCTTTGAAC<br>GCAAGTTG  | CTAGTCACTCTCCTCCGCTTATT<br>GATATG    | A | PS0925MT02 |
| 65 | <i>Cirsium japonicum</i>   | CTGGACCTGACGAGTTTTTGAA<br>CGCAAGTT  | CTGGACCTGAGTTTCTTTTCCT<br>CCGCTTATT  | C | PS0612MT02 |
| 66 | <i>Cirsium japonicum</i>   | CACGCTACGTCGAGTTTTTGAA<br>CGCAAGTT  | CACGCTACGTGTTTCTTTTCCT<br>CCGCTTATT  | C | PS0612MT03 |
| 67 | <i>Cirsium japonicum</i>   | TCTCTATGCGCGAGTTTTTGAA<br>CGCAAGTTG | TCTCTATGCGGTTTCTTTTCCTC<br>CGCTTATTG | B | PS0612MT06 |
| 68 | <i>Cirsium setosum</i>     | CAGGTCCAGTCGAGTTTTTGAA<br>CGCAAGTTG | CAGGTCCAGTGTTTCTTTTCCT<br>CCGCTTATTG | B | PS0611MT01 |
| 69 | <i>Cirsium setosum</i>     | TCGTGACATGCGAGTTTTTGAA<br>CGCAAGTTG | TCGTGACATGGTTTCTTTTCCT<br>CCGCTTATTG | B | PS0611MT02 |
| 70 | <i>Cirsium setosum</i>     | ATCCGCCGTACGAGTTTTTGAA<br>CGCAAGTT  | ATCCGCCGTAGTTTCTTTTCCTC<br>CGCTTATT  | C | PS0611MT04 |

|    |                                     |                                    |                                   |   |            |
|----|-------------------------------------|------------------------------------|-----------------------------------|---|------------|
| 71 | <i>Citrus aurantium</i>             | ACTGGACCTGGAGTCTTTGAA<br>CGCAAGTTG | ACTGGACCTGTCCTCCGCTTAT<br>TGATATG | A | PS1613MT01 |
| 72 | <i>Citrus limonum</i>               | ACGTTACCGTGAGTCTTTGAAC<br>GCAAGTTG | ACGTTACCGTTCCTCCGCTTATT<br>GATATG | A | PS1609MT01 |
| 73 | <i>Citrus maxima</i>                | ACGGTGGATCGAGTCTTTGAAC<br>GCAAGTTG | ACGGTGGATCTCCTCCGCTTAT<br>TGATATG | A | PS1600MT04 |
| 74 | <i>Citrus maxima</i>                | AGACGCACTCGAGTCTTTGAA<br>CGCAAGTTG | AGACGCACTCTCCTCCGCTTAT<br>TGATATG | A | PS1600MT05 |
| 75 | <i>Citrus maxima</i>                | AGCCTCCAGTGAGTCTTTGAAC<br>GCAAGTTG | AGCCTCCAGTTCCTCCGCTTAT<br>TGATATG | A | PS1600MT06 |
| 76 | <i>Citrus maxima</i>                | AGCCTCCTGAGAGTCTTTGAAC<br>GCAAGTTG | AGCCTCCTGATCCTCCGCTTATT<br>GATATG | A | PS1600MT08 |
| 77 | <i>Citrus maxima</i>                | AGCCTGGCATGAGTCTTTGAAC<br>GCAAGTTG | AGCCTGGCATTCTCCGCTTAT<br>TGATATG  | A | PS1600MT09 |
| 78 | <i>Citrus medica</i>                | AGCTTAGGCTGAGTCTTTGAAC<br>GCAAGTTG | AGCTTAGGCTTCCTCCGCTTAT<br>TGATATG | A | PS1616MT02 |
| 79 | <i>Citrus reticulata</i>            | ATCGGAGAATCCCGTGACCCAT<br>C        | ATCGGATCTTTTCCTCCGCTTAT<br>TG     | C | PS1596MT01 |
| 80 | <i>Clerodendrum bungei</i>          | ACATGACGACGAGTCTTTGAA<br>CGCAAGTTG | ACATGACGACTCCTCCGCTTAT<br>TGATATG | A | PS0853MT01 |
| 81 | <i>Clerodendrum<br/>cytophyllum</i> | TAGCCAGGCTGAGTCTTTGAAC<br>GCAAGTTG | TAGCCAGGCTTCCTCCGCTTAT<br>TGATATG | A | PS0856MT02 |
| 82 | <i>Clerodendrum<br/>japonicum</i>   | ACACATACGCGAGTCTTTGAAC<br>GCAAGTTG | ACACATACGCTCCTCCGCTTAT<br>TGATATG | A | PS0851MT01 |
| 83 | <i>Cryptotaenia<br/>japonica</i>    | CGTAGACTAGGAGTCTTTGAAC<br>GCAAGTTG | CGTAGACTAGTCCTCCGCTTAT<br>TGATATG | A | PS1223MT01 |
| 84 | <i>Cynanchum atratum</i>            | ATGGAGTCTTTGAACGCA                 | GGGGAATCCTTGTTAGTTT               | C | PS0833MT01 |
| 85 | <i>Cynanchum</i>                    | TGTCACACGAGAGTCTTTGAA              | TGTCACACGATCCTCCGCTTAT            | A | PS0836MT01 |

|    |                                    |                                    |                                    |   |            |
|----|------------------------------------|------------------------------------|------------------------------------|---|------------|
|    | <i>paniculatum</i>                 | CGCAAGTTG                          | TGATATG                            |   |            |
| 86 | <i>Cynanchum<br/>stauntonii</i>    | CGTGTCTCTAGAGTCTTTGAAC<br>GCAAGTTG | CGTGTCTCTATCCTCCGCTTATT<br>GATATG  | A | PS0835MT04 |
| 87 | <i>Datura arborea</i>              | CGTTACCGTAGAGTCTTTGAAC<br>GCAAGTTG | CGTTACCGTATCCTCCGCTTATT<br>GATATG  | A | PS1147MT01 |
| 88 | <i>Datura metel</i>                | CGTTAGGTACGAGTCTTTGAAC<br>GCAAGTTG | CGTTAGGTACTCCTCCGCTTATT<br>GATATG  | A | PS1152MT02 |
| 89 | <i>Daucus carota</i>               | ACGGTAACGTGAGTCTTTGAAC<br>GCAAGTTG | ACGGTAACGTTCCCTCCGCTTAT<br>TGATATG | A | PS1225MT02 |
| 90 | <i>Dendrobium<br/>capillipes</i>   | ATCGGCAAGTGAGTCTTTGAAC<br>GCAAGTTG | ATCGGCAAGTTCCTCCGCTTAT<br>TGATATG  | A | PS2502MT01 |
| 91 | <i>Dendrobium<br/>catenatum</i>    | CGAATAACTGGAGTCTTTGAAC<br>GCAAGTTG | CGAATAACTGTCCTCCGCTTAT<br>TGATATG  | A | PS2521MT01 |
| 92 | <i>Dendrobium<br/>chrysanthum</i>  | CAGTTAGGTCGAGTCTTTGAAC<br>GCAAGTTG | CAGTTAGGTCTCCTCCGCTTAT<br>TGATATG  | A | PS2515MT01 |
| 93 | <i>Dendrobium<br/>chrysotoxum</i>  | ATAGAGTACTGAGTCTTTGAAC<br>GCAAGTTG | ATAGAGTACTTCCTCCGCTTATT<br>GATATG  | A | PS2501MT01 |
| 94 | <i>Dendrobium<br/>chrysotoxum</i>  | ATCGGATTCGGAGTCTTTGAAC<br>GCAAGTTG | ATCGGATTCGTCCCTCCGCTTATT<br>GATATG | A | PS2501MT03 |
| 95 | <i>Dendrobium<br/>crepidatum</i>   | CAGTTCAAGTGAGTCTTTGAAC<br>GCAAGTTG | CAGTTCAAGTTCCTCCGCTTAT<br>TGATATG  | A | PS2517MT01 |
| 96 | <i>Dendrobium<br/>crystallinum</i> | CATGGCAATGGAGTCTTTGAAC<br>GCAAGTTG | CATGGCAATGTCCTCCGCTTATT<br>GATATG  | A | PS2519MT01 |
| 97 | <i>Dendrobium<br/>cucullatum</i>   | CGACAGCGAGGAGTCTTTGAA<br>CGCAAGTTG | CGACAGCGAGTCCCTCCGCTTAT<br>TGATATG | A | PS2523MT01 |
| 98 | <i>Dendrobium<br/>denneanum</i>    | ATGGCTTACGGAGTCTTTGAAC<br>GCAAGTTG | ATGGCTTACGTCCCTCCGCTTATT<br>GATATG | A | PS0758MT01 |
| 99 | <i>Dendrobium</i>                  | CATTGAAGCTGAGTCTTTGAAC             | CATTGAAGCTTCCTCCGCTTATT            | A | PS2520MT01 |

|     |                            |                         |                          |   |            |
|-----|----------------------------|-------------------------|--------------------------|---|------------|
|     | <i>devonianum</i>          | GCAAGTTG                | GATATG                   |   |            |
| 100 | <i>Dendrobium</i>          | CAGGTGGCTAGAGTCTTTGAAC  | CAGGTGGCTATCCTCCGCTTAT   | A | PS2513MT01 |
|     | <i>gratiosissimum</i>      | GCAAGTTG                | TGATATG                  |   |            |
| 101 | <i>Dendrobium</i>          | AGTCCTCCAGGAGTCTTTGAAC  | AGTCCTCCAGTCCTCCGCTTAT   | A | PS1748MT02 |
|     | <i>loddigesii</i>          | GCAAGTTG                | TGATATG                  |   |            |
| 102 | <i>Dendrobium nobile</i>   | ATGTACGATGGAGTCTTTGAAC  | ATGTACGATGTCCTCCGCTTATT  | A | PS0766MT04 |
|     |                            | GCAAGTTG                | GATATG                   |   |            |
| 103 | <i>Dendrobium nobile</i>   | ATGTGTCTAGGAGTCTTTGAAC  | ATGTGTCTAGTCCTCCGCTTATT  | A | PS0766MT06 |
|     |                            | GCAAGTTG                | GATATG                   |   |            |
| 104 | <i>Dendrobium</i>          | CAGGTGGCATGAGTCTTTGAAC  | CAGGTGGCATTCTCCGCTTAT    | A | PS2511MT01 |
|     | <i>pendulum</i>            | GCAAGTTG                | TGATATG                  |   |            |
| 105 | <i>Dendrobium</i>          | CAGTTGCCTAGAGTCTTTGAAC  | CAGTTGCCTATCCTCCGCTTATT  | A | PS2518MT01 |
|     | <i>polyanthum</i>          | GCAAGTTG                | GATATG                   |   |            |
| 106 | <i>Dendrobium</i>          | CATGGAGGCTGAGTCTTTGAAC  | CATGGAGGCTTCCTCCGCTTAT   | A | PS2518MT02 |
|     | <i>polyanthum</i>          | GCAAGTTG                | TGATATG                  |   |            |
| 107 | <i>Dendrobium spatella</i> | CGATTACCTGGAGTCTTTGAAC  | CGATTACCTGTCCTCCGCTTATT  | A | PS2527MT01 |
|     |                            | GCAAGTTG                | GATATG                   |   |            |
| 108 | <i>Dendrobium</i>          | ATGCCGTTACGAGTCTTTGAAC  | ATGCCGTTACTCCTCCGCTTATT  | A | PS2506MT01 |
|     | <i>trigonopus</i>          | GCAAGTTG                | GATATG                   |   |            |
| 109 | <i>Dendrobium</i>          | ATGCCTAACGGAGTCTTTGAAC  | ATGCCTAACGTCCTCCGCTTATT  | A | PS2509MT01 |
|     | <i>wardianum</i>           | GCAAGTTG                | GATATG                   |   |            |
| 110 | <i>Dendrobium</i>          | ATGGCGGTCAGAGTCTTTGAAC  | ATGGCGGTCATCCTCCGCTTATT  | A | PS2509MT02 |
|     | <i>wardianum</i>           | GCAAGTTG                | GATATG                   |   |            |
| 111 | <i>Dendrobium</i>          | ATGCCATTGCGAGTCTTTGAAC  | ATGCCATTGCTCCTCCGCTTATT  | A | PS2503MT01 |
|     | <i>williamsonii</i>        | GCAAGTTG                | GATATG                   |   |            |
| 112 | <i>Dichroa febrifuga</i>   | CGATTTCGGATGAGTCTTTGAAC | CGATTTCGGATTCCTCCGCTTATT | A | PS0850MT01 |
|     |                            | GCAAGTTG                | GATATG                   |   |            |
| 113 | <i>Eleutherococcus</i>     | TATCACTCAGGAGTCTTTGAAC  | TATCACTCAGTCCTCCGCTTATT  | A | PS1461MT01 |



|     |                                   |                        |                         |   |                         |
|-----|-----------------------------------|------------------------|-------------------------|---|-------------------------|
|     | <i>giraldii</i>                   | GCAAGTTG               | GATATG                  |   |                         |
| 114 | <i>Eleutherococcus nodiflorus</i> | TCACGTACTAGAGTCTTTGAAC | TCACGTACTATCCTCCGCTTATT | A | PS1473MT01              |
|     |                                   | GCAAGTTG               | GATATG                  |   |                         |
| 115 | <i>Eleutherococcus senticosus</i> | TAGTCGCATAGAGTCTTTGAAC | TAGTCGCATATCCTCCGCTTATT | A | PS1456MT03              |
|     |                                   | GCAAGTTG               | GATATG                  |   |                         |
| 116 | <i>Ephedra equisetina</i>         | ATGCACCGAGTCTTTGAACGCA | ATGCACTATGCTTAAACTCAGC  | A | PS0848MT01              |
|     |                                   | AGTTG                  | GGGTG                   |   |                         |
| 117 | <i>Ephedra equisetina</i>         | CAGTTCCGAGTCTTTGAACGCA | CAGTTCTATGCTTAAACTCAGC  | A | PS0848MT02              |
|     |                                   | AGTTG                  | GGGTG                   |   |                         |
| 118 | <i>Ephedra sinica</i>             | CAGTAGACGTGAGTCTTTGAAC | CAGTAGACGTTCCCTCCGCTTAT | A | PS0847MT01              |
|     |                                   | GCAAGTTG               | TGATATG                 |   |                         |
| 119 | <i>Epimedium acuminatum</i>       | TGATACGTCTGAGTCTTTGAAC | TGATACGTCTCCTCCGCTTATT  | A | PS1499MT01              |
|     |                                   | GCAAGTTG               | GATATG                  |   |                         |
| 120 | <i>Epimedium acuminatum</i>       | TGATGTGTACGAGTCTTTGAAC | TGATGTGTACTCCTCCGCTTATT | A | PS1499MT02              |
|     |                                   | GCAAGTTG               | GATATG                  |   |                         |
| 121 | <i>Epimedium pubescens</i>        | TGTAGTGTGAGAGTCTTTGAAC | TGTAGTGTGATCCTCCGCTTATT | A | PS1505MT01              |
|     |                                   | GCAAGTTG               | GATATG                  |   |                         |
| 122 | <i>Epimedium sagittatum</i>       | TGCTATAGACGAGTCTTTGAAC | TGCTATAGACTCCTCCGCTTATT | A | PS1502MT02              |
|     |                                   | GCAAGTTG               | GATATG                  |   |                         |
| 123 | <i>Epimedium sagittatum</i>       | TGTACTACTCGAGTCTTTGAAC | TGTACTACTCTCCTCCGCTTATT | A | PS1502MT03              |
|     |                                   | GCAAGTTG               | GATATG                  |   |                         |
| 124 | <i>Eupatorium fortunei</i>        | AGACTATACTCGAGTTTTTGAA | AGACTATACTGTTTCTTTTCCTC | B | PS0672MT01 <sup>S</sup> |
|     |                                   | CGCAAGTTG              | CGCTTATTG               |   |                         |
| 125 | <i>Euphorbia esula</i>            | ATCAGACACGGAGTCTTTGAA  | ATCAGACACGTCCTCCGCTTAT  | A | PS0193MT01              |
|     |                                   | CGCAAGTTG              | TGATATG                 |   |                         |
| 126 | <i>Euphorbia hirta</i>            | AGTTCAAGTCGAGTCTTTGAAC | AGTTCAAGTCTCCTCCGCTTAT  | A | PS0175MT02              |
|     |                                   | GCAAGTTG               | TGATATG                 |   |                         |
| 127 | <i>Euphorbia hirta</i>            | CTAGGTCCAGGAGTCTTTGAAC | CTAGGTCCAGTCCTCCGCTTAT  | A | PS0175MT03              |

|     |                              |                                    |                                     |   |            |
|-----|------------------------------|------------------------------------|-------------------------------------|---|------------|
| 128 | <i>Euphorbia pekinensis</i>  | GCAAGTTG<br>CTAGGCTTAGGAGTCTTTGAAC | TGATATG<br>CTAGGCTTAGTCCTCCGCTTATT  | A | PS0187MT01 |
| 129 | <i>Flemingia lineata</i>     | GCAAGTTG<br>ATACAGAATCCCGTGAACCAT  | GATATG<br>CGCTTTTCCTCCGCTTATTGA     | C | PS0223MT01 |
| 130 | <i>Flemingia macrophylla</i> | AGAGAGTGTGGAGTCTTTGAA<br>CGCAAGTTG | AGAGAGTGTGTCCTCCGCTTAT<br>TGATATG   | A | PS0222MT02 |
| 131 | <i>Flemingia macrophylla</i> | AGTCTGACTGGAGTCTTTGAAC<br>GCAAGTTG | AGTCTGACTGTCCTCCGCTTAT<br>TGATATG   | A | PS0222MT03 |
| 132 | <i>Foeniculum vulgare</i>    | TACGGTAACGGAGTCTTTGAAC<br>GCAAGTTG | TACGGTAACGTCCTCCGCTTAT<br>TGATATG   | A | PS1222MT03 |
| 133 | <i>Gentiana macrophylla</i>  | AAGAATCCCGTGAACCATCG               | GGTCCTTGTTAGTTTCTTTTCCT<br>CC       | C | PS0821MT02 |
| 134 | <i>Gentiana manshurica</i>   | GACCAGAATCCCGTGAACCAT              | CCTTCTTTTCCTCCGCTTATTG              | C | PS0823MT01 |
| 135 | <i>Gentiana rigescens</i>    | CAGGTAAGTCGAGTCTTTGAAC<br>GCAAGTTG | CAGGTAAGTCTCCTCCGCTTAT<br>TGATATG   | A | PS0822MT01 |
| 136 | <i>Gentiana straminea</i>    | CGTACTCAGAGAGTCTTTGAAC<br>GCAAGTTG | CGTACTCAGATCCTCCGCTTATT<br>GATATG   | A | PS0820MT01 |
| 137 | <i>Gentiana straminea</i>    | CTACGCTCTAGAGTCTTTGAAC<br>GCAAGTTG | CTACGCTCTATCCTCCGCTTATT<br>GATATG   | A | PS0820MT02 |
| 138 | <i>Ilex asprella</i>         | TGCCAGGTCACGAGTTTTTGAA<br>CGCAAGTT | TGCCAGGTCAGTTTCTTTTCCT<br>CCGCTTATT | C | PS0325MT01 |
| 139 | <i>Ilex cornuta</i>          | CGATCTGTCGCGAGTTTTTGAA<br>CGCAAGTT | CGATCTGTCGGTTTCTTTTCCTC<br>CGCTTATT | C | PS0320MT01 |
| 140 | <i>Ilex cornuta</i>          | CGCAGTACGACGAGTTTTTGAA<br>CGCAAGTT | CGCAGTACGAGTTTCTTTTCCT<br>CCGCTTATT | C | PS0320MT03 |
| 141 | <i>Ilex cornuta</i>          | CGTCGATCTCCGAGTTTTTGAA<br>CGCAAGTT | CGTCGATCTCGTTTCTTTTCCTC<br>CGCTTATT | C | PS0320MT05 |
| 142 | <i>Ilex pubilimba</i>        | TGCCAGGACTCGAGTTTTTGAA             | TGCCAGGACTGTTTCTTTTCCT              | C | PS0324MT01 |

|     |                                                    |                                                 |                                      |   |            |
|-----|----------------------------------------------------|-------------------------------------------------|--------------------------------------|---|------------|
| 143 | <i>Ilex rotunda</i>                                | CGCAAGTT<br>TGCCACCGATCGAGTTTTTGAA              | CCGCTTATT<br>TGCCACCGATGTTTCTTTTCCT  | C | PS0321MT01 |
| 144 | <i>Inula britannica</i>                            | CGCAAGTT<br>TATACATGTGCGAGTTTTTGAA              | CCGCTTATT<br>TATACATGTGGTTTCTTTTCCTC | B | PS0670MT01 |
| 145 | <i>Inula britannica</i>                            | CGCAAGTTG<br>TATCTGATAGCGAGTTTTTGAA             | CGCTTATTG<br>TATCTGATAGGTTTCTTTTCCTC | B | PS0670MT02 |
| 146 | <i>Inula cappa</i>                                 | CGCAAGTTG<br>GCACAGAATCCCGTGAACCAT              | CGCTTATTG<br>CGATCTTTTCCTCCGCTTATTG  | C | PS0701MT01 |
| 147 | <i>Inula helenium</i>                              | GCACAGAATCCCGTGAACCAT                           | CGATCTTTTCCTCCGCTTATTG               | C | PS0689MT01 |
| 148 | <i>Ipomoea nil</i>                                 | AGCCAGAATCCCGTGAACCAT<br>TGTATCACAGGAGTCTTTGAAC | GATATG<br>TGTATCACAGTCCCTCCGCTTATT   | A | PS1536MT01 |
| 149 | <i>Ipomoea nil</i>                                 | GCAAGTTG<br>TGTGAGTAGTGAGTCTTTGAAC              | GATATG<br>TGTGAGTAGTTCCTCCGCTTAT     | A | PS1536MT05 |
| 150 | <i>Ipomoea purpurea</i>                            | GCAAGTTG<br>ACAGTCGTGCGAGTCTTTGAA               | TGATATG<br>ACAGTCGTGCTCCTCCGCTTAT    | A | PS1542MT05 |
| 151 | <i>Ligusticum jeholense</i>                        | CGCAAGTTG<br>CTGTACATACGAGTCTTTGAAC             | TGATATG<br>CTGTACATACTCCTCCGCTTATT   | A | PS1213MT02 |
| 152 | <i>Ligusticum sinense</i>                          | GCAAGTTG<br>CTGGATTGACGAGTCTTTGAAC              | GATATG<br>CTGGATTGACTCCTCCGCTTATT    | A | PS1208MT01 |
| 153 | <i>Ligusticum sinense</i> cv.<br><i>Chuanxiong</i> | GCAAGTTG<br>CTGAACCAGAATCCCGTGAAC               | GATATG<br>CTGAACTCTTTTCCTCCGCTTAT    | C | PS1203MT01 |
| 154 | <i>Ligusticum sinense</i> cv.<br><i>Chuanxiong</i> | CATC<br>CTGACTCAGAATCCCGTGAACC                  | TGA<br>CTGACTTCTTTTCCTCCGCTTAT       | C | PS1203MT02 |
| 155 | <i>Lilium pumilum</i>                              | ATC<br>ATATAGTCGCGAGTCTTTGAAC                   | TGA<br>ATATAGTCGCTCCTCCGCTTATT       | A | PS0064MT01 |
| 156 | <i>Lilium tigrinum</i>                             | GCAAGTTG<br>AGTTCGGACTGAGTCTTTGAAC              | GATATG<br>AGTTCGGACTTCCTCCGCTTAT     | A | PS0039MT01 |
| 157 | <i>Liriope spicata</i>                             | GCAAGTTG<br>AGTTCTTGACGAGTCTTTGAAC              | TGATATG<br>AGTTCTTGACTCCTCCGCTTATT   | A | PS0055MT01 |

|     |                                             |                                    |                                   |   |            |
|-----|---------------------------------------------|------------------------------------|-----------------------------------|---|------------|
| 158 | <i>Lonicera confusa</i>                     | GCAAGTTG<br>CGTTAGGTCAGAGTCTTTGAAC | GATATG<br>CGTTAGGTCATCCTCCGCTTATT | A | PS1161MT03 |
| 159 | <i>Lonicera japonica</i>                    | GCAAGTTG<br>CTAAGCCTAGGAGTCTTTGAAC | GATATG<br>CTAAGCCTAGTCCTCCGCTTATT | A | PS1165MT02 |
| 160 | <i>Lygodium japonicum</i>                   | GCAAGTTG<br>AGCTATCGAGTCTTTGAACGCA | GATATG<br>AGCTATTGCCTGATTTGAGGTC  | C | PS0395MT01 |
| 161 | <i>Lygodium japonicum</i>                   | ACTTG<br>AGCTTACGAGTCTTTGAACGCA    | CGAG<br>AGCTTATGCCTGATTTGAGGTC    | C | PS0395MT02 |
| 162 | <i>Lygodium japonicum</i>                   | ACTTG<br>ATCGTACGAGTCTTTGAACGCA    | CGAG<br>ATCGTATGCCTGATTTGAGGTC    | C | PS0395MT03 |
| 163 | <i>Lygodium japonicum</i>                   | ACTTG<br>CGTATACGAGTCTTTGAACGCA    | CGAG<br>CGTATATGCCTGATTTGAGGTC    | C | PS0395MT04 |
| 164 | <i>Lygodium japonicum</i>                   | ACTTG<br>TCGATACGAGTCTTTGAACGCA    | CGAG<br>TCGATATGCCTGATTTGAGGTC    | C | PS0395MT05 |
| 165 | <i>Melicope pteleifolia</i>                 | ACTTG<br>ACGTTGAATCGAGTCTTTGAAC    | GATATG<br>ACGTTGAATCTCCTCCGCTTATT | A | PS1610MT01 |
| 166 | <i>Oryza sativa</i> ssp.<br><i>indica</i>   | GCAAGTTG<br>TACGTCGAGTCTTTGAACGCAA | GATATG<br>TACGTCCCTCGTAAGTTTCTTC  | A | PS9003MT01 |
| 167 | <i>Oryza sativa</i> ssp.<br><i>indica</i>   | GTTG<br>TCGAGAGAGTCTTTGAACGCA      | TCCTC<br>TCGAGACCTCGTAAGTTTCTTC   | A | PS9003MT02 |
| 168 | <i>Oryza sativa</i> ssp.<br><i>indica</i>   | AGTTG<br>TGC ACTGAGTCTTTGAACGCA    | TCCTC<br>TGCACTCCTCGTAAGTTTCTTC   | A | PS9003MT03 |
| 169 | <i>Oryza sativa</i> ssp.<br><i>japonica</i> | AGTTG<br>CTGAGAGAGTCTTTGAACGCA     | TCCTC<br>CTGAGACCTCGTAAGTTTCTTC   | A | PS9002MT01 |
| 170 | <i>Oryza sativa</i> ssp.<br><i>japonica</i> | AGTTG<br>AGCTGAGAGTCTTTGAACGCA     | TCCTC<br>AGCTGACCTCGTAAGTTTCTTC   | A | PS9002MT02 |
| 171 | <i>Paeonia anomala</i> ssp.                 | AGTTG<br>ACGTGTATCACCGAGTCTTTGA    | TCCTC<br>ACGTGTGTTTCTTTTCCTCCGC   | C | PS0906MT01 |

|     |                             |                                    |                                   |   |                             |
|-----|-----------------------------|------------------------------------|-----------------------------------|---|-----------------------------|
|     | <i>veitchii</i>             | ACGC                               | TTATTG                            |   |                             |
| 172 | <i>Paeonia anomala</i> ssp. | CAGTGTATCACCGAGTCTTTGA             | CAGTGTGTTTCTTTTCCTCCGC            | C | PS0906MT02                  |
|     | <i>veitchii</i>             | ACGC                               | TTATTG                            |   |                             |
| 173 | <i>Paeonia lactiflora</i>   | ACGTCTCATCGAGTCTTTGAAC<br>GCAAGTTG | ACGTCTCATCTCCTCCGCTTATT<br>GATATG | A | PS0905MT01 <sup>&amp;</sup> |
| 174 | <i>Paeonia ostii</i>        | AGTGACACACGAGTCTTTGAA<br>CGCAAGTTG | AGTGACACACTCCTCCGCTTAT<br>TGATATG | A | PS0913MT02                  |
| 175 | <i>Panax ginseng</i>        | TATGATACGCGAGTCTTTGAAC<br>GCAAGTTG | TATGATACGCTCCTCCGCTTATT<br>GATATG | A | PS1467MT01                  |
| 176 | <i>Panax japonicus</i>      | TCACTCATACGAGTCTTTGAAC<br>GCAAGTTG | TCACTCATACTCCTCCGCTTATT<br>GATATG | A | PS1477MT01                  |
| 177 | <i>Panax japonicus</i>      | TCGATAGTGAGAGTCTTTGAAC<br>GCAAGTTG | TCGATAGTGATCCTCCGCTTATT<br>GATATG | A | PS1477MT02                  |
| 178 | <i>Panax japonicus</i>      | TGACGTATGTGAGTCTTTGAAC<br>GCAAGTTG | TGACGTATGTTCTCCGCTTATT<br>GATATG  | A | PS1477MT03                  |
| 179 | <i>Panax japonicus</i>      | TGAGTCAGTAGAGTCTTTGAAC<br>GCAAGTTG | TGAGTCAGTATCCTCCGCTTATT<br>GATATG | A | PS1477MT04                  |
| 180 | <i>Panax notoginseng</i>    | TCAAGCCAGTGAGTCTTTGAA<br>CGCAAGTTG | TCAAGCCAGTTCCTCCGCTTAT<br>TGATATG | A | PS1469MT02                  |
| 181 | <i>Panax notoginseng</i>    | TCAAGCCTGAGAGTCTTTGAA<br>CGCAAGTTG | TCAAGCCTGATCCTCCGCTTAT<br>TGATATG | A | PS1469MT03                  |
| 182 | <i>Panax quinquefolius</i>  | TCAAGTTAGCGAGTCTTTGAAC<br>GCAAGTTG | TCAAGTTAGCTCCTCCGCTTAT<br>TGATATG | A | PS1472MT01                  |
| 183 | <i>Periploca sepium</i>     | TGCAACGGATGAGTCTTTGAAC<br>GCAAGTTG | TGCAACGGATTCCTCCGCTTAT<br>TGATATG | A | PS0840MT03                  |
| 184 | <i>Pinus bungeana</i>       | ACTGATCCGTGAATCATCCGAG<br>TTTTTG   | ACTGATAGCGGGTGTTCGCCC<br>TGA      | C | PS1348MT01                  |
| 185 | <i>Pinus ponderosa</i>      | CAGTTAGCAGAATCCCGTGAAT             | CAGTTAGGGTGTTCGCTGA               | C | PS1359MT01                  |

|     |                             |                                      |                                        |   |            |
|-----|-----------------------------|--------------------------------------|----------------------------------------|---|------------|
| 186 | <i>Pinus strobus</i>        | CATC<br>CGATATGCAGAATCCCGTGAAT       | GC<br>CGATATGGGTGTTCTCGCCTGA           | C | PS1350MT01 |
| 187 | <i>Pinus wallichiana</i>    | CATC<br>TGACATGCAGAATCCCGTGAAT       | GC<br>TGACATGGGTGTTCTCGCCTGA           | C | PS1357MT01 |
| 188 | <i>Piper longum</i>         | CATC<br>ACGACTACAGGAGTCTTTGAA        | GC<br>ACGACTACAGTCCTCCGCTTAT           | A | PS0445MT01 |
| 189 | <i>Piper longum</i>         | CGCAAGTTG<br>TACTCTCGTGGAGTCTTTGAAC  | TGATATG<br>TACTCTCGTGTCTCCGCTTATT      | A | PS0445MT02 |
| 190 | <i>Piper nigrum</i>         | GCAAGTTG<br>ATCCGTTCGAGAGTCTTTGAAC   | GATATG<br>ATCCGTTCGATCCTCCGCTTATT      | A | PS0449MT02 |
| 191 | <i>Polygonum chinense</i>   | GCAAGTTG<br>CGCGTATACAGAGTCTTTGAAC   | GATATG<br>CGCGTATACATCCTCCGCTTATT      | A | PS0794MT01 |
| 192 | <i>Polygonum chinense</i>   | GCAAGTTG<br>CGTACAGTCAGAGTCTTTGAAC   | GATATG<br>CGTACAGTCATCCTCCGCTTATT      | A | PS0794MT02 |
| 193 | <i>Populus trichocarpa</i>  | GCAAGTTG<br>TCAGAGAGAATCCCGTGAACC    | GATATG<br>TCAGAGTCCTCCGCTTATTGATA      | C | PS9004MT01 |
| 194 | <i>Potentilla chinensis</i> | ATCG<br>CGACGTGACTCGAGTTTTTGAA       | TGCT<br>CGACGTGACTGTTTCTTTTCCT         | B | PS1120MT01 |
| 195 | <i>Potentilla chinensis</i> | CGCAAGTTG<br>TAGTGATAGATCGAGTTTTTGAA | CCGCTTATTG<br>TAGTGATAGATGTTTCTTTTCCTC | B | PS1120MT02 |
| 196 | <i>Potentilla fruticosa</i> | CGCAAGTTG<br>CATTGCCATGGAGTCTTTGAAC  | CGCTTATTG<br>CATTGCCATGTCTCCGCTTATT    | A | PS1084MT01 |
| 197 | <i>Potentilla nivea</i>     | GCAAGTTG<br>TCGATCACGTCGAGTTTTTGAA   | GATATG<br>TCGATCACGTGTTTCTTTTCCTC      | B | PS1124MT01 |
| 198 | <i>Potentilla supina</i>    | CGCAAGTTG<br>TCAGGCTTGAGAGTCTTTGAAC  | CGCTTATTG<br>TCAGGCTTGATCCTCCGCTTATT   | A | PS1067MT01 |
| 199 | <i>Potentilla supina</i>    | GCAAGTTG<br>TCAGGTCCAGGAGTCTTTGAA    | GATATG<br>TCAGGTCCAGTCCTCCGCTTAT       | A | PS1067MT02 |

|     |                                                |                                     |                                       |   |            |
|-----|------------------------------------------------|-------------------------------------|---------------------------------------|---|------------|
| 200 | <i>Prenanthes tatarinowii</i>                  | CGCAAGTTG<br>CTAAGAACGTCGAGTTTTTGAA | TGATATG<br>CTAAGAACGTGTTTCTTTTCCT     | B | PS0671MT01 |
| 201 | <i>Pueraria m ontana</i><br>var. <i>lobata</i> | CGCAAGTTG<br>CGTCTAGTACGAGTCTTTGAAC | CCGCTTATTG<br>CGTCTAGTACTCCTCCGCTTATT | A | PS0313MT04 |
| 202 | <i>Pueraria peduncularis</i>                   | GCAAGTTG<br>AATCAGAATCCCGTGAACCAT   | GATATG<br>GGCTTTTCCTCCGCTTATTG        | C | PS0314MT01 |
| 203 | <i>Rhus chinensis</i>                          | CATACTCTACGAGTCTTTGAAC<br>GCAAGTTG  | CATACTCTACTCCTCCGCTTATT<br>GATATG     | A | PS1014MT03 |
| 204 | <i>Rosa bella</i>                              | TGAACAATCGGAGTCTTTGAAC<br>GCAAGTTG  | TGAACAATCGTCCTCCGCTTAT<br>TGATATG     | A | PS1098MT01 |
| 205 | <i>Rosa laevigata</i>                          | TCGGACCTAGGAGTCTTTGAAC<br>GCAAGTTG  | TCGGACCTAGTCCTCCGCTTAT<br>TGATATG     | A | PS1085MT01 |
| 206 | <i>Rubus chingii</i>                           | TGAGTGACGCGAGTCTTTGAA<br>CGCAAGTTG  | TGAGTGACGCTCCTCCGCTTAT<br>TGATATG     | A | PS1135MT01 |
| 207 | <i>Rubus parvifolius</i>                       | CATTGTTAGCGAGTCTTTGAAC<br>GCAAGTTG  | CATTGTTAGCTCCTCCGCTTATT<br>GATATG     | A | PS1093MT01 |
| 208 | <i>Santalum album</i>                          | ACTTGTTTCAGGAGTCTTTGAAC<br>GCAAGTTG | ACTTGTTTCAGTCCTCCGCTTATT<br>GATATG    | A | PS1377MT03 |
| 209 | <i>Sedum emarginatum</i>                       | ATCTACTGACGAGTCTTTGAAC<br>GCAAGTTG  | ATCTACTGACTCCTCCGCTTATT<br>GATATG     | A | PS0574MT03 |
| 210 | <i>Sedum lineare</i>                           | TCTAGCGACTGAGTCTTTGAAC<br>GCAAGTTG  | TCTAGCGACTTCCTCCGCTTATT<br>GATATG     | A | PS0577MT01 |
| 211 | <i>Sedum sarmentosum</i>                       | AGCACTGTAGGAGTCTTTGAAC<br>GCAAGTTG  | AGCACTGTAGTCCTCCGCTTAT<br>TGATATG     | A | PS0575MT01 |
| 212 | <i>Sedum sarmentosum</i>                       | TACGCTGTCTGAGTCTTTGAAC<br>GCAAGTTG  | TACGCTGTCTTCCTCCGCTTATT<br>GATATG     | A | PS0575MT02 |
| 213 | <i>Selaginella</i>                             | TGACCGTCCGTGAATCATCAA               | TGACCGTAGTTTCTTTTCCTCC                | C | PS0729MT01 |

|     |                             |                        |                          |   |                             |
|-----|-----------------------------|------------------------|--------------------------|---|-----------------------------|
|     | <i>doederleinii</i>         | TGTT                   | GCTTA                    |   |                             |
| 214 | <i>Selaginella</i>          | AGCTCTCGAGTCTTTGAACGCA | AGCTCTTAGTTTCTTTTCCTCCG  | C | PS0727MT01                  |
|     | <i>moellendorffii</i>       | CATTG                  | CTTAGT                   |   |                             |
| 215 | <i>Selaginella uncinata</i> | CGAATCTTTGAACGCACAT    | CGGTTTCTTTTCCTCCGCTTA    | C | PS0726MT01                  |
| 216 | <i>Senna alata</i>          | TAGCTCTATCGAGTCTTTGAAC | TAGCTCTATCTCCTCCGCTTATT  | A | PS1362MT02                  |
|     |                             | GCAAGTTG               | GATATG                   |   |                             |
| 217 | <i>Senna obtusifolia</i>    | ACGACAGCTCGAGTCTTTGAA  | ACGACAGCTCTCCTCCGCTTAT   | A | PS1588MT08                  |
|     |                             | CGCAAGTTG              | TGATATG                  |   |                             |
| 218 | <i>Siegesbeckia</i>         | TACCGCCATGGAGTCTTTGAAC | TACCGCCATGTCCTCCGCTTATT  | A | PS0660MT01                  |
|     | <i>glabrescens</i>          | GCAAGTTG               | GATATG                   |   |                             |
| 219 | <i>Siegesbeckia</i>         | ACGTGCAGCGCGAGTTTTTGA  | ACGTGCAGCGGTTTCTTTTCCT   | B | PS0618MT05                  |
|     | <i>orientalis</i>           | ACGCAAGTTG             | CCGCTTATTG               |   |                             |
| 220 | <i>Siraitia grosvenorii</i> | CTGAATGGACGAGTCTTTGAAC | CTGAATGGACTCCTCCGCTTAT   | A | PS0464MT02                  |
|     |                             | GCAAGTTG               | TGATATG                  |   |                             |
| 221 | <i>Solanum lyratum</i>      | CGAATCCGATGAGTCTTTGAAC | CGAATCCGATTCCCTCCGCTTATT | A | PS1137MT01                  |
|     |                             | GCAAGTTG               | GATATG                   |   |                             |
| 222 | <i>Solanum nigrum</i>       | AGTCCAGGTCGAGTCTTTGAA  | AGTCCAGGTCCTCCGCTTAT     | A | PS1144MT02                  |
|     |                             | CGCAAGTTG              | TGATATG                  |   |                             |
| 223 | <i>Sophora flavescens</i>   | ATCGTCTGTGGAGTCTTTGAAC | ATCGTCTGTGTCCTCCGCTTATT  | A | PS0247MT04                  |
|     |                             | GCAAGTTG               | GATATG                   |   |                             |
| 224 | <i>Sophora japonica</i>     | ATCCGAATCGGAGTCTTTGAAC | ATCCGAATCGTCCTCCGCTTATT  | A | PS0241MT03                  |
|     |                             | GCAAGTTG               | GATATG                   |   |                             |
| 225 | <i>Sophora tonkinensis</i>  | ATCGTAGCAGGAGTCTTTGAAC | ATCGTAGCAGTCCTCCGCTTAT   | A | PS0228MT01                  |
|     |                             | GCAAGTTG               | TGATATG                  |   |                             |
| 226 | <i>Stellaria vestita</i>    | CGTAACGGTAGAGTCTTTGAAC | CGTAACGGTATCCTCCGCTTATT  | A | PS1317MT01                  |
|     |                             | GCAAGTTG               | GATATG                   |   |                             |
| 227 | <i>Stemmacantha</i>         | ACGTCTCATCGAGTCTTTGAAC | ACGTCTCATCTCCTCCGCTTATT  | A | PS0674MT01 <sup>&amp;</sup> |
|     | <i>uniflora</i>             | GCAAGTTG               | GATATG                   |   |                             |



|     |                                                      |                                    |                                   |   |            |
|-----|------------------------------------------------------|------------------------------------|-----------------------------------|---|------------|
| 228 | <i>Tetradium ruticarpum</i>                          | ACTGGTCCGAGAGTCTTTGAA<br>CGCAAGTTG | ACTGGTCCGATCCTCCGCTTAT<br>TGATATG | A | PS1614MT01 |
| 229 | <i>Torreya californica</i>                           | CTAAGTTCAGGAGTCTTTGAAC<br>GCAAGTTG | CTAAGTTCAGTCCTCCGCTTAT<br>TGATATG | A | PS1186MT01 |
| 230 | <i>Torreya f. argesii</i> var.<br><i>yunnanensis</i> | CTAGGTGAATCCCGTGAATCAT<br>CG       | CTAGGTGTTTCTTTTCCCTCCGCT<br>TA    | C | PS1190MT01 |
| 231 | <i>Torreya grandis</i>                               | TAGCCTGAGTCTTTGAACGCAA<br>GTTG     | TAGCCTCTTTTCCCTCCGCTTAAT<br>GAT   | A | PS1744MT01 |
| 232 | <i>Torreya grandis</i>                               | CGATTTCGAGTCTTTGAACGCAA<br>GTTG    | CGATTCTTTTCCCTCCGCTTAAT<br>GAT    | A | PS1744MT02 |
| 233 | <i>Torreya nucifera</i>                              | CTAAGTTGCAGAGTCTTTGAAC<br>GCAAGTTG | CTAAGTTGCATCCTCCGCTTATT<br>GATATG | A | PS1187MT01 |
| 234 | <i>Uncaria macrophylla</i>                           | ATCCGTTAGCGAGTCTTTGAAC<br>GCAAGTTG | ATCCGTTAGCTCCTCCGCTTATT<br>GATATG | A | PS1038MT01 |
| 235 | <i>Uncaria macrophylla</i>                           | ATGGCAATGCGAGTCTTTGAAC<br>GCAAGTTG | ATGGCAATGCTCCTCCGCTTATT<br>GATATG | A | PS1038MT03 |
| 236 | <i>Uncaria macrophylla</i>                           | ATGGCGGTACGAGTCTTTGAAC<br>GCAAGTTG | ATGGCGGTACTCCTCCGCTTAT<br>TGATATG | A | PS1038MT04 |
| 237 | <i>Uncaria sessilifructus</i>                        | TCATCGAGTCGAGTCTTTGAAC<br>GCAAGTTG | TCATCGAGTCTCCTCCGCTTATT<br>GATATG | A | PS1041MT02 |
| 238 | <i>Uncaria sinensis</i>                              | CATGCTCAGAATCCCGTGAACC<br>ATC      | CATGCTGTAATCCCGCCTGACC<br>TG      | C | PS1039MT01 |
| 239 | <i>Verbena officinalis</i>                           | AGTACGCTATGAGTCTTTGAAC<br>GCAAGTTG | AGTACGCTATTCTCCGCTTATT<br>GATATG  | A | PS0865MT03 |
| 240 | <i>Veronicastrum<br/>axillare</i>                    | AGCTTCTTGAGAGTCTTTGAAC<br>GCAAGTTG | AGCTTCTTGATCCTCCGCTTATT<br>GATATG | A | PS1525MT01 |
| 241 | <i>Veronicastrum<br/>stenostachyum</i>               | AGTCCGAACGAGTCTTTGAA<br>CGCAAGTTG  | AGTCCGAACCTCCTCCGCTTAT<br>TGATATG | A | PS1519MT01 |

|     |                                  |                                    |                                    |   |                         |
|-----|----------------------------------|------------------------------------|------------------------------------|---|-------------------------|
| 242 | <i>Viola diffusa</i>             | ACGCGAGTATGAGTCTTTGAAC<br>GCAAGTTG | ACGCGAGTATTCCTCCGCTTAT<br>TGATATG  | A | PS0555MT01              |
| 243 | <i>Viola philippica</i>          | ACTGTGCAGAATCCCGTGAATC<br>ATC      | ACTGTGTCTTTTCCTCCGCTTAT<br>TG      | C | PS0561MT02              |
| 244 | <i>Zanthoxylum<br/>bungeanum</i> | ACGCTCGACAGAGTCTTTGAA<br>CGCAAGTTG | ACGCTCGACATCCTCCGCTTAT<br>TGATATG  | A | PS1599MT01              |
| 245 | <i>Zea mays</i>                  | TATAGACATCCGAGTTTTTGAA<br>CGCAAGT  | TATAGACATCGTTTCTTCTCCTC<br>CGCTTAT | C | PS9005MT01              |
| 246 | <i>Zea mays</i>                  | AGACTATACTCGAGTTTTTGAA<br>CGCAAGT  | AGACTATACTGTTTCTTCTCCTC<br>CGCTTAT | C | PS9005MT02 <sup>§</sup> |
| 247 | <i>Zea mays</i>                  | AGTATACATACGAGTTTTTGAA<br>CGCAAGT  | AGTATACATAGTTTCTTCTCCTC<br>CGCTTAT | C | PS9005MT03              |

\* A: universal primer type 1, B: universal primer type 2, C: special primer

<sup>§</sup> The 454 reads for the samples PS0672MT01 and PS9005MT02 were manually inspected because they have same primers and tags.

<sup>&</sup> The 454 reads for the samples PS0674MT01 and PS0905MT01 were manually inspected because they have same primers and tags.
