# Supplementary material for: Extensive Pyrosequencing Reveals Frequent Intra-Genomic Variations of Internal Transcribed Spacer Regions of Nuclear Ribosomal DNA
Source: PubMed Central journal article supplement (PMC3431384; doi:10.1371/journal.pone.0043971), 2012-08-30
Supplement: pone.0043971.s016.pdf [file pone.0043971.s016.pdf]

**Table S6.** PCR cycling regime for primers in **Table S5**.

|            | Temperature     | Time  |
|------------|-----------------|-------|
| 1 cycle:   | 94 °C           | 5min  |
| 33 cycles: | 94 °C           | 30sec |
|            | 56 °C (58 °C) * | 30sec |
|            | 72 °C           | 40sec |
| 1 cycle:   | 72 °C           | 7min  |

\* 56 °C for universal primer type 1 in **Table S5**

58 °C for special primers and universal primer type 2 in **Table S5**
