# Supplementary material for: Extensive Pyrosequencing Reveals Frequent Intra-Genomic Variations of Internal Transcribed Spacer Regions of Nuclear Ribosomal DNA
Source: PubMed Central journal article supplement (PMC3431384; doi:10.1371/journal.pone.0043971), 2012-08-30
Supplement: pone.0043971.s017.pdf [file pone.0043971.s017.pdf]

**Table S7.** GenBank accession numbers of the 37 previously published ITS2 sequences from Araliaceae and two outgroup taxa.

| Species                                                 | Accession number |
|---------------------------------------------------------|------------------|
| <i>Aralia elata</i>                                     | AF273526         |
| <i>Aralia elata</i> var. <i>mandshurica</i>             | AF273528         |
| <i>Aralia spinosa</i>                                   | GU054699         |
| <i>Aralia stellata</i>                                  | GU054650         |
| <i>Billardiera heterophylla</i>                         | AY829019         |
| <i>Brassaiopsis glomerulata</i>                         | AY725111         |
| <i>Brassaiopsis grushvitzkyi</i>                        | AF551728         |
| <i>Brassaiopsis malayana</i>                            | DQ007367         |
| <i>Brassaiopsis sumatrana</i>                           | DQ007365         |
| <i>Dendropanax dentiger</i>                             | GU054694         |
| <i>Dendropanax hainanensis</i>                          | AF242236         |
| <i>Eleutherococcus gracilistylus</i>                    | GQ434779         |
| <i>Eleutherococcus japonicus</i> f. <i>kiusianus</i>    | AY548183         |
| <i>Eleutherococcus koreanus</i>                         | AY548184         |
| <i>Eleutherococcus nodiflorus</i>                       | U63184           |
| <i>Eleutherococcus senticosus</i>                       | GU054610         |
| <i>Eleutherococcus senticosus</i> f. <i>inermis</i>     | AY548186         |
| <i>Eleutherococcus seoulensis</i>                       | AY548187         |
| <i>Eleutherococcus sessiliflorus</i>                    | GQ434778         |
| <i>Eleutherococcus sieboldianus</i>                     | AY548190         |
| <i>Eleutherococcus simonii</i>                          | AF242227         |
| <i>Eleutherococcus trifoliatus</i>                      | AF551739         |
| <i>Eleutherococcus trifoliatus</i> f. <i>spinifolia</i> | AY548191         |
| <i>Hymenosporum flavum</i>                              | AY829026         |
| <i>Macropanax rosthornii</i>                            | GU054613         |
| <i>Merrilliopanax alpinus</i>                           | AY233309         |
| <i>Merrilliopanax chinensis</i>                         | AY389040         |
| <i>Metapanax davidii</i>                                | AF242233         |
| <i>Metapanax delavayi</i>                               | GU054612         |
| <i>Oreopanax argentatus</i>                             | DQ007400         |
| <i>Oreopanax echinops</i>                               | AF242229         |
| <i>Panax japonicus</i>                                  | GQ434782         |
| <i>Panax notoginseng</i>                                | AY271919         |
| <i>Panax pseudoginseng</i>                              | U41693           |
| <i>Panax quinquefolius</i>                              | U41688           |

---

|                            |          |
|----------------------------|----------|
| <i>Panax stipuleanatus</i> | U41695   |
| <i>Trevesia baviensis</i>  | AF551731 |
| <i>Trevesia palmata</i>    | AF551735 |
| <i>Trevesia sundaica</i>   | AF551732 |

---
