# Supplementary material for: Extensive Pyrosequencing Reveals Frequent Intra-Genomic Variations of Internal Transcribed Spacer Regions of Nuclear Ribosomal DNA
Source: PubMed Central journal article supplement (PMC3431384; doi:10.1371/journal.pone.0043971), 2012-08-30
Supplement: pone.0043971.s018.pdf [file pone.0043971.s018.pdf]

**Table S8.** Specific primer pairs for the corresponding species.

| Species                         | Specific Primer Name | Specific Primer Sequence (5'-3') |
|---------------------------------|----------------------|----------------------------------|
| <i>Potentilla chinensis</i> ,   | PCA_ITS2F            | AACCCCTTCGGTGGCTGGA              |
|                                 | PCA_ITS2R            | CGACGAATCGACACGCATTAGG           |
| <i>Potentilla nivea</i>         | PCA_5.8F             | GCAGAATCCCGTGAACCATCG            |
|                                 | PCA_28SR             | CGGTTCGCTCGCCGTTACTA             |
| <i>Citrus limonum</i>           | CL_5.8F              | GCAGAATCCCGTGAACCATCG            |
|                                 | CL_ITS2R1            | GATGCGAGCGCCGCTTGC               |
|                                 | CL_ITS2R2            | GCTTGCGCGGAGCTTCAA               |
|                                 | CL_ITS2F             | CTCGATCTCCGGCCGTGT               |
| <i>Eleutherococcus giraldii</i> | ITS2-F               | AACCCATCACTCCCTTGC               |
|                                 | 28S-R                | GTTCGCTCGCCGTTACTA               |
|                                 | 5.8S-F               | CAGAATCCCGTGAACCATC              |
