# Supplementary material for: Extensive Pyrosequencing Reveals Frequent Intra-Genomic Variations of Internal Transcribed Spacer Regions of Nuclear Ribosomal DNA
Source: PubMed Central journal article supplement (PMC3431384; doi:10.1371/journal.pone.0043971), 2012-08-30
Supplement: pone.0043971.s019.pdf [file pone.0043971.s019.pdf]

**Table S9.** The PCR cycling and reaction conditions for specific primer pairs in **Table S8**.

A. PCR cycling for *Eleutherococcus giraldii*.

|            | Temperature | Time  |
|------------|-------------|-------|
| 1 cycle:   | 94 °C       | 5min  |
| 33 cycles: | 94 °C       | 30sec |
|            | 60 °C       | 30sec |
|            | 72 °C       | 30sec |
| 1 cycle:   | 72 °C       | 10min |

B. Reaction conditions for *Eleutherococcus giraldii*.

| Reaction Conditions                     | Volume (μL) |
|-----------------------------------------|-------------|
| 10× Standard <i>Taq</i> Reaction Buffer | 2.5         |
| dNTP(2.5mM each)                        | 0.8         |
| Forward primer(10μM)                    | 0.6         |
| Reverse primer(10μM)                    | 0.6         |
| NEB <i>Taq</i> DNA Polymerase(5U/μL)    | 0.1         |
| DNA template (ca. 15ng/μL)              | 2.0         |
|                                         | Up to 25μL  |

C. PCR cycling for *Potentilla chinensis*, *Potentilla nivea*, *Citrus limonum*.

|            | Temperature | Time  |
|------------|-------------|-------|
| 1 cycle:   | 94 °C       | 5min  |
| 33 cycles: | 94 °C       | 30sec |
|            | 65 °C       | 30sec |
|            | 72 °C       | 45sec |
| 1 cycle:   | 72 °C       | 7min  |

D. Reaction conditions for *Potentilla chinensis*, *Potentilla nivea*, *Citrus limonum*.

| Reaction Conditions                            | Volume (μL) |
|------------------------------------------------|-------------|
| 2×PrimeSTAR® GC Buffer (Mg <sup>2+</sup> plus) | 12.5        |
| dNTP(2.5mM each)                               | 1           |
| Forward primer(10μM)                           | 0.6         |
| Reverse primer(10μM)                           | 0.6         |
| PrimeSTAR® HS DNA Polymerase (2.5U/μL)         | 0.25        |
| DNA template (ca. 15ng/μL)                     | 2.0         |
|                                                | Up to 25μL  |
